# Supplementary material
Source: Elsevier journal article supplement (https://www.sciencedirect.com/science/article/pii/S0210569121002175)
Supplement: mmc1 [file S0210569121002175:mmc1.pdf]

## **A Differential Therapeutic consideration for use of Corticosteroids according to Established COVID-19 Clinical Phenotypes in Critically ill Patients**

### **Supplementary Online Content**

**e-Methods.** Supplemental Methods

**e-Table 1:** Variables recorded in the study

**e-Table 2:** Ranking of variables according to the information value to select important variables in a predictive model.

**e-Table 3:** Ranking of variables according to the information value to select important variables in each phenotype.

**e-Table 4:** Characteristics of whole population and different phenotypes according corticosteroid treatment

**e-Figure 1:** Mean differences plot of variables before and after propensity full matching

**e-Table 5:** Forest plot of variables associated with ICU mortality in the multivariate analysis in whole population

**e-Figure 2:** Area under ROC curve for ICU mortality multivariate model in the whole population

**e-Table 6:** Characteristics of 537 A phenotype patients according to ICU mortality

**e-Figure 3:** Unadjusted survival plot (Kaplan-Meier plot) for A phenotype patients according to corticosteroids treatment

**e-Table 7:** Ranking of variables according to the information value to select important variables in each phenotype.

**e-Table 8:** Factors associated with ICU mortality in Cox Hazard regression analysis for patients among A phenotype

**e-Figure 4:** Competing risk analysis plot for A phenotype

**e-Table 9:** Factors associated with corticosteroids use in multivariate analysis for A phenotype patient

**e-Table 10:** Characteristics of 623 B phenotype patients according to ICU mortality

**e-Figure 5:** Unadjusted survival plot (Kaplan-Meier) for B phenotype patients according to corticosteroids treatment

**e-Figure 6:** Competing risk analysis plot for B phenotype

**e-Table 11:** Factors associated with ICU mortality in Cox Hazard regression analysis for patients among B phenotype

**e-Table 12:** Factors associated with corticosteroids use in multivariate analysis for B phenotype patient

**e-Table 13:** Characteristics of 857 C phenotype patients according to ICU mortality

**e-Figure 7:** Unadjusted survival plot (Kaplan-Meier) for C phenotype patients according to corticosteroids treatment

**e-Figure 8:** Shoenfeld test plot for Cox proportional Hazard regression in C phenotype

**e-Table 14:** Factors associated with ICU mortality in Cox Hazard regression analysis for patients among C phenotype

**e-Table 15:** Variables associated with corticosteroid use in C phenotype patients

## **e-Methods. Supplemental Methods**

### *Data Collection and Validation*

Data were collected using a paper CRF (case Report Form). CRF collect and record all protocol-required information, which is transcribed from patient source documents, such as hospital records and laboratory reports during the patient's participation in the study. Before being sent to the Study Coordinator (AR) this data was de-identified (not traceable to the patient) by removing the patient's name, medical record number, etc., and giving the patient a unique study number. We implemented a double data entry model for potential errors in real-time. Data was entered twice by two different Data Entry personnel based on the same set of data collected in the paper CRFs. All data were reviewed, and values that appeared incongruent or out of range were manually validated by confirming the accuracy of the data with the Study Coordinator (AR). The database was validated and cleaned before the statistical analysis and finally, the study database was locked to prevent any further changes, and to ensure data consistency and integrity for the statistical reporting and analysis.

### *Study population*

The study enrolled consecutive adult patients (>16 years) with laboratory confirmed SARS-CoV-2 infection, detected by RT-PCR positive test of nasopharyngeal, oropharyngeal swab or invasive respiratory samples according to the WHO recommendations. The follow-up of patients was scheduled until August 11, 2020, which confirmed ICU discharge or death whichever occurred first. The study was approved by the reference institutional review board at Joan XXIII University Hospital (IRB# CEIM/066/2020) and each participating site with a waiver of informed consent.

*Outcomes* The primary outcome included all-causes of ICU mortality. Patients who were discharged alive from ICU were evaluated in the data as alive considering mortality was defined as any in-ICU death. All complications and outcomes were followed during ICU admission.

### *Approach to missing data*

Continuous variables with missing data > 30% were excluded of database. Missing data for continuous variables were imputed using R-package "missForest" for the statistical software R/CRAN. The imputation was applied to impute the missing values of D dimer (20%), Ferritin (20%), D-Lactate dehydrogenase (17%), Procalcitonin (17%), creatinine (16%), SOFA score (16%), APACHE II score (10%) and C-reactive protein (CRP) (5%). Categorical data (including ICU mortality) were available for all patients.

### *Study definitions*

Community-acquired pneumonia (CAP) was defined in accordance with current American Thoracic Society and Infectious Diseases Society of America guidelines (ATS/IDSA )(4).

Primary viral pneumonia due to SARS-CoV-2 infection was defined by the presence of acute respiratory failure and unequivocal alveolar opacities involving one or more lobes, with negative respiratory and blood bacterial cultures at ICU admission.

Shock was defined in accordance with the Surviving Sepsis Campaign guidelines (5); that is, patients in whom adequate fluid resuscitation and vasopressor therapy are unable to restore hemodynamic stability.

Acute Kidney injury (AKI) was defined according to Consensus Conference of the Acute Dialysis Quality Initiative (6).

Acute respiratory distress syndrome (ARDS) was defined according Berlin definition (7) in 3 categories based on degree of hypoxemia: mild ( $\text{PaO}_2/\text{FIO}_2 \leq 300$  mm Hg), moderate ( $\text{PaO}_2/\text{FIO}_2 \leq 200$  mm Hg), and severe ( $\text{PaO}_2/\text{FIO}_2 \leq 100$  mm Hg)

## References

- 4.- Metlay JP, Waterer GW, Long AC, Anzueto A, Brozek J, Crothers K, et al. Diagnosis and Treatment of Adults with Community-acquired Pneumonia. An Official Clinical Practice Guideline of the American Thoracic Society and Infectious Diseases Society of America. *Am J Resp Crit Care Med* 2019 ;200(7): e45-e67. <https://www.atsjournals.org/doi/full/10.1164/rccm.201908-1581ST>
- 5.- Dellinger RP, Levy MM, Rhodes A, Annane D, Gerlach H, Opal SM et al. Surviving sepsis campaign: international guidelines for management of severe sepsis and septic shock: 2012. *Crit Care Med* 2013;41(2):580-637. <https://www.doi/10.1097/CCM.0b013e31827e83af>.
- 6.- Bellomo R. Ronco C. Kellum J.A. et al. Acute renal failure—definition, outcome measures, animal models, fluid therapy and information technology needs: the Second International Consensus Conference of the Acute Dialysis Quality Initiative (ADQI) Group. *Crit Care*. 2004; 8: R204-R212
- 7.- Ranieri VM, Rubenfeld GD, Thompson BT, Ferguson ND, Caldwell E, Fan E, Camporota L, Slutsky AS. Acute respiratory distress syndrome: The Berlin Definition ARDS Definition Task Force. *JAMA* 2012;307(23):2526-33. <https://doi/10.1001/jama.2012.5669>.

## Statistical analysis

To determine if a significant inter-hospital variation in corticosteroids is present, multilevel conditional logistic modelling with patients nested in hospital to characterize hospital-level variation of ICU mortality was done. We built a model with corticosteroids (treatment) and hospital as random variable, to assess the variation of the log-odds from one hospital to another and calculate the intraclass correlation coefficient (ICC) for one-way random-effects model.

The ICC quantifies the degree of homogeneity of the outcome within clusters and represents the proportion of the between-hospital variation in the total variation. When the ICC is not different from zero or negligible, indicates perfect independence of residuals and traditional one level regression analysis can be done (6). The ICC obtained when considering all hospital (n=63) was 0.04. This ICC represents that the hospital-level variation was very poor (4%).

```
model_cov<- lmer(muereUCI ~ cortis +(1|hospital), REML = FALSE, data=covid_mis)
summary(model_cov)
confint(model_cov)
```

Linear mixed model fit by maximum likelihood ['lmerMod']

Formula: muereUCI ~ cortis + (1 | hospital)

Data: covid\_mis

| AIC | BIC | logLik | deviance | df.resid |
|-----|-----|--------|----------|----------|
|-----|-----|--------|----------|----------|

|        |        |         |        |      |
|--------|--------|---------|--------|------|
| 2661.9 | 2684.4 | -1327.0 | 2653.9 | 2018 |
|--------|--------|---------|--------|------|

Scaled residuals:

| Min | 1Q | Median | 3Q | Max |
|-----|----|--------|----|-----|
|-----|----|--------|----|-----|

|         |         |         |        |        |
|---------|---------|---------|--------|--------|
| -1.0293 | -0.7188 | -0.5961 | 1.2942 | 1.7045 |
|---------|---------|---------|--------|--------|

Random effects:

| Groups   | Name        | Variance | Std.Dev. |
|----------|-------------|----------|----------|
| hospital | (Intercept) | 0.006893 | 0.08302  |
| Residual |             | 0.213283 | 0.46183  |

Number of obs: 2022, groups: hospital, 63

Fixed effects:

|             | Estimate | Std. Error | t value |
|-------------|----------|------------|---------|
| (Intercept) | 1.32097  | 0.02068    | 63.872  |
| cortissi    | 0.01084  | 0.02210    | 0.491   |

Correlation of Fixed Effects:

|          | (Intr) |
|----------|--------|
| cortissi | -0.643 |

Computing profile confidence intervals ...

|             | 2.5 %       | 97.5 %     |
|-------------|-------------|------------|
| .sig01      | 0.05308768  | 0.11813691 |
| .sigma      | 0.44775260  | 0.47664905 |
| (Intercept) | 1.28038742  | 1.36242446 |
| cortissi    | -0.03273725 | 0.05431544 |

Show in New Window

[1] 0.009727901

intraclass correlation coefficient

icc <- model\_cov@theta[1]^2 / (model\_cov@theta[1]^2 + (3.14159^2/3))

icc

[1] 0.009727901

**e-Table 1:** Definitions of variables recorded, Comorbidities, Treatments, and Outcomes Collected in patients

| <b>General characteristics and severity of illness</b>                           |                                                                                                                                         |
|----------------------------------------------------------------------------------|-----------------------------------------------------------------------------------------------------------------------------------------|
| Hospital type                                                                    | According to beds number (<200 ; 200-500 and > 500 beds)                                                                                |
| Sex                                                                              | 1:Male; 0: Female                                                                                                                       |
| Age                                                                              | Number of years of age at the time of ICU admission                                                                                     |
| Date of Hospital admission                                                       | Per chart review                                                                                                                        |
| Date of ICU admission                                                            | Per chart review                                                                                                                        |
| Date of ICU discharge                                                            | Per chart review                                                                                                                        |
| Date of Hospital discharge                                                       | Per chart review                                                                                                                        |
| GAP ICU                                                                          | Time in days from Hospital to ICU admission                                                                                             |
| GAP diagnosis                                                                    | Time in days from onset of symptoms to diagnosis                                                                                        |
| GAP antiviral treatment                                                          | Time in days from onset of symptoms to first dose of antiviral                                                                          |
| APACHE II score                                                                  | Acute Physiology and Chronic Health Evaluation (APACHE) II score was calculated for all patients within the first 24 h of ICU admission |
| SOFA score                                                                       | Sequential Organ Failure Assessment (SOFA) scoring system was calculated for all patients within the first 24 h of ICU admission.       |
| Health worker                                                                    | People who work in the hospital or other areas of health care                                                                           |
| <b>Comorbidities and coexisting conditions</b>                                   |                                                                                                                                         |
| 9.- Asthma                                                                       | Per chart review                                                                                                                        |
| 10.- Chronic Pulmonary Obstructive Disease                                       | Per chart review                                                                                                                        |
| 11.- Arterial Hypertension                                                       | Per chart review                                                                                                                        |
| 12.- Chronic Heart disease                                                       | Per chart review. New York Heart Association (NYHA) Functional Classification III and IV                                                |
| 13.- Chronic kidney disease                                                      | Baseline eGFR< 60 on at least two consecutive values at least 12 weeks apart prior or hemodialysis                                      |
| 14.- Hematologic disease                                                         | Per chart review, included acute leukemia, myelodysplastic syndrome and Lymphomas.                                                      |
| 15.- Pregnancy                                                                   | Per chart review                                                                                                                        |
| 16.- Obesity                                                                     | Body mass index > 30                                                                                                                    |
| 17.- Diabetes mellitus                                                           | Per chart review                                                                                                                        |
| 18.- HIV/AIDS                                                                    | Per chart review                                                                                                                        |
| 19.- Coronary artery disease                                                     | Per chart review                                                                                                                        |
| 20.- Neuromuscular disease                                                       | Per chart review                                                                                                                        |
| 21.- Immunological disease                                                       | Per chart review                                                                                                                        |
| 22.- Other Immunodeficiency disorders                                            | Per chart review                                                                                                                        |
| <b>Laboratory findings</b>                                                       |                                                                                                                                         |
| D-Lactate dehydrogenase                                                          | U/L, Per laboratory report                                                                                                              |
| White blood cell                                                                 | x10 <sup>9</sup> Per laboratory report                                                                                                  |
| Serum Creatinine                                                                 | mg/dL, Per laboratory report                                                                                                            |
| C-Reactive Protein (CRP)                                                         | mg/mL, Per laboratory report                                                                                                            |
| Procalcitonin (PCT)                                                              | ng/mL, Per laboratory report                                                                                                            |
| Serum lactate                                                                    | mmol/L, Per laboratory report                                                                                                           |
| D dimer                                                                          | ng/mL, Per laboratory report                                                                                                            |
| Ferritin                                                                         | ng/mL, Per laboratory report                                                                                                            |
| Arterial blood gas (ABG) test                                                    | Per laboratory report                                                                                                                   |
| <b>Treatment at ICU admission</b>                                                |                                                                                                                                         |
| Corticosteroids                                                                  | Per chart review                                                                                                                        |
| Antibiotics                                                                      | Per chart review                                                                                                                        |
| Lopinavir/ritonavir                                                              | Per chart review                                                                                                                        |
| Hydroxychloroquine                                                               | Per chart review                                                                                                                        |
| Tocilizumab                                                                      | Per chart review                                                                                                                        |
| Interferon $\beta$                                                               | Per chart review                                                                                                                        |
| Anti-hypertensive treatment                                                      | ACEI: Angiotensin Converting Enzyme Inhibitors; ARB: Angiotensin receptor blockers                                                      |
| <b>Oxygenation and ventilator support at ICU admission and at first 24 hours</b> |                                                                                                                                         |
| Oxygen mask                                                                      | Per chart review                                                                                                                        |
| High Flow nasal cannula                                                          | Per chart review                                                                                                                        |
| Non-invasive ventilation                                                         | Per chart review                                                                                                                        |
| Invasive mechanical ventilation                                                  | Per chart review                                                                                                                        |
| Oxygen mask                                                                      | Per chart review                                                                                                                        |
| High Flow nasal cannula                                                          | Per chart review                                                                                                                        |

| <b>Complications at ICU admission</b>   |                        |
|-----------------------------------------|------------------------|
| Shock                                   | Per chat review        |
| Acute kidney dysfunction                | Per chat review        |
| Myocardial dysfunction                  | Per chat review        |
| Community-acquired co-infection         | Per chat review        |
| > 2 Quadrant infiltrates in chest x-ray | Per chest x-ray review |
| <b>Outcome</b>                          |                        |
| ICU crude mortality                     | Per chart review       |

## Development of phenotypes

All consecutive cases admitted to the ICU were collected. There were no patients excluded from the analysis that were enrolled based on the participating ICUs' established criteria. The ICU admission criteria, use of antiviral, antibiotic or co-adjuvant treatment, and also the measures that would determine the need to intubate and type of ventilator support required (oxygenation, high flow nasal cannula [HFNC], noninvasive [NIMV] or invasive [IMV] mechanical ventilation) were not standardized between centers. These guidelines were left to the discretion of the attending physician, according to SEMICYUC and National Ministry of Health and were included in the case report form and confirmed by the medical records. Defining variables recorded, comorbidities, treatments, and outcomes collected in all patients are shown in e-Table 1 in supplementary online content.

The analysis plan for the development of the phenotypes was carried out through the following steps:

In a first step, a multilevel conditional logistic modelling and the intraclass correlation coefficient (ICC) was calculated with patients nested in hospital to characterize hospital-level variation of ICU mortality and not a significant inter-hospital variation was observed.

In a second step, to determine presence of distinct clinical phenotypes in our population of COVID-19 patients, an unsupervised clustering analysis was applied to the database at ICU admission. In order to carry out this analysis, a discretization of the numerical variables into categorical ones was done. The information provided by each variable regarding ICU mortality was defined using the Information Value (IV). A IV greater than 0.03 was considered clinically important and this variable was included in the multivariate logistic regression analysis.

Model performance was examined using accuracy test, Sensitivity, Specificity and AUC modeling. Subsequently, the unsupervised cluster analysis was performed using the important variables. The Podani distance was used to calculate the distance between patients and the "partition around medoids" (PAM) algorithm to perform the clustering. Three was the optimal number of clusters determined after studying the silhouette and the PAM objective. Each of these clusters represent a specific patient's phenotype. We obtain important variables by the IV for each phenotype, and the OR of these variables were obtained after applying a GLM analysis. Multinomial regression models were fit to further compare patient comorbidities across phenotype classification. Model performance in each phenotype was examined using accuracy test, Sensibility, Specificity and AUC.

Lastly, a traditional multivariate analysis (GLM: Generalized linear Regression model) was performed to investigate the association between baseline (on ICU admission) variables and ICU-mortality. The GLM model comprised factors of clinical interest and all significant covariates ( $p < 0.05$ ) in the univariate analysis of ICU mortality and presence of collinearity was studied by variance inflation factors (VIF). To determine our model, we checked adequate model performance between groups with a cross validation model (K-fold=10) and the model with better performance was chosen.

For all model validation, database was randomly split into two subsets: (a) a "training set" (80%), and (b) a "validation set" (20%). Model performance was examined using accuracy test, precision, sensitivity,

specificity and area under ROC curve (AUC). Data analysis was performed using R software (cran.r-project.org).

Of the 50 variables considered, only 25 were considered as predictors according to the IV and were included in the model. Remarkably, no treatment option was a predictive factor for ICU-mortality (e-Table 2).

e-Table 2: Ranking of variables according to the information value to select important variables in a predictive model. Highly and somewhat predictive variables were included in the model.

(ACEI: Angiotensin Converting Enzyme Inhibitors; ARB: Angiotensin receptor blockers; WBC: White blood cells; HFNC: High Flow nasal cannula, NIV: non-invasive ventilation, MV: invasive mechanical ventilation, CRP: C-Reactive Protein; PCT: Procalcitonin; GAP antiviral: Time from the symptoms onset to the first dose of antiviral, GAP diagnostic: Time from the symptoms onset to diagnosis, GAP ICU: time from the symptoms onset to ICU admission. )

| ## VARIABLES                  | Information Value | HSTRENGTH           |
|-------------------------------|-------------------|---------------------|
| ## 1 Hospital type            | 4.041964e-03      | Not Predictive      |
| ## 2 Male                     | 9.730608e-03      | Not Predictive      |
| ## 3 Influenza vaccine        | 2.719595e-02      | Not Predictive      |
| ## 4 shock                    | 1.025376e-01      | Highly Predictive   |
| ## 5 Health worker            | 3.939070e-02      | Somewhat Predictive |
| ## 6 ACEI                     | 5.176515e-02      | Somewhat Predictive |
| ## 7 ARB                      | 1.407840e-02      | Not Predictive      |
| ## 8 asthma                   | 4.023492e-04      | Not Predictive      |
| ## 9 COPD                     | 4.605924e-02      | Somewhat Predictive |
| ## 10 Chronic Cardiac Dis     | 3.472710e-03      | Not Predictive      |
| ## 11 Chronic Renal Dis       | 2.721800e-02      | Not Predictive      |
| ## 12 Hematological Dis       | 2.144353e-02      | Not Predictive      |
| ## 13 Pregnancy               | 2.253727e-03      | Not Predictive      |
| ## 14 Obesity                 | 2.452981e-03      | Not Predictive      |
| ## 15 Diabetes                | 4.266095e-02      | Somewhat Predictive |
| ## 16 HIV                     | 9.368383e-04      | Not Predictive      |
| ## 17 Neuromuscular Dis       | 8.444705e-03      | Not Predictive      |
| ## 18 Autoimmune Dis          | 5.088465e-04      | Not Predictive      |
| ## 19 Coronary Dis            | 5.313002e-02      | Somewhat Predictive |
| ## 20 Hypertension            | 9.908557e-02      | Somewhat Predictive |
| ## 21 Infiltrates chest x-ray | 3.931693e-02      | Somewhat Predictive |
| ## 22 Corticosteroids         | 4.460850e-03      | Not Predictive      |
| ## 23 Antibiotics             | 7.133596e-05      | Not Predictive      |
| ## 24 Empiric treatment       | 1.926115e-04      | Not Predictive      |
| ## 25 Lopinavir/ritonavir     | 2.828696e-03      | Not Predictive      |
| ## 26 interferon beta-1       | 1.351955e-02      | Not Predictive      |
| ## 27 Hydroxychloroquine      | 8.557354e-03      | Not Predictive      |
| ## 28 Tocilizumab             | 9.848787e-03      | Not Predictive      |
| ## 29 O2                      | 7.471572e-03      | Not Predictive      |
| ## 30 Bacterial coinfection   | 6.317831e-03      | Not predictive      |
| ## 31 HFNC                    | 6.584694e-02      | Somewhat Predictive |
| ## 32 NIV                     | 1.044679e-03      | Not Predictive      |
| ## 33 MV                      | 1.195287e-01      | Highly Predictive   |
| ## 34 Myocardial Dysf.        | 1.020782e-01      | Highly Predictive   |
| ## 35 Acute Kidney injury     | 4.267500e-01      | Highly Predictive   |
| ## 36 Age                     | 5.583901e-01      | Highly Predictive   |
| ## 37 APACHE II               | 5.038235e-01      | Highly Predictive   |
| ## 38 SOFA                    | 3.964658e-01      | Highly Predictive   |
| ## 39 Lactate dehydrogenase   | 1.623883e-01      | Highly Predictive   |
| ## 40 WBC                     | 5.118266e-02      | Somewhat Predictive |
| ## 41 Creatinine              | 2.605650e-01      | Highly Predictive   |
| ## 42 CRP                     | 5.374965e-02      | Somewhat Predictive |
| ## 43 PCT                     | 1.590328e-01      | Highly Predictive   |
| ## 44 Lactate                 | 1.674733e-01      | Highly Predictive   |
| ## 45 D Dimer                 | 1.728036e-01      | Highly Predictive   |
| ## 46 Ferritin                | 3.332789e-01      | Highly Predictive   |
| ## 47 Gap antiviral           | 0.000000e+00      | Not Predictive      |
| ## 48 PaO2/FiO2               | 6.116536e-02      | Somewhat Predictive |
| ## 49 Gap diagnostic          | 1.738805e-02      | Not Predictive      |
| ## 50 Gap ICU                 | 5.325043e-02      | Somewhat Predictive |

The categorized variables independently associated with ICU-mortality in each phenotype are shown in e-Table 3. The performance of the model was adequate with an accuracy of 0.77, sensitivity of 0.88, specificity of 0.54 and AUC of 0.82.

e-Table 3: Ranking of variables according to the information value to select important variables in each phenotype. Variables highlighted in red were included in each model. (ACEI: Angiotensin Converting Enzyme Inhibitors; ARB: Angiotensin receptor blockers; WBC: White blood cells; HFNC: High Flow nasal cannula, NIV: non-invasive ventilation, MV: invasive mechanical ventilation, CRP: C-Reactive Protein; PCT:

| Variables                     | A Phenotype  |            | B Phenotype  |            | C Phenotype  |            |
|-------------------------------|--------------|------------|--------------|------------|--------------|------------|
|                               | IV           | PREDICTIVE | IV           | PREDICTIVE | IV           | PREDICTIVE |
| ## 1 Hospital type            | 9.132863e-03 | No         | 1.559446e-03 | No         | 2.944340e-02 | No         |
| ## 2 Male                     | 1.444146e-04 | No         | 2.590207e-02 | No         | 3.869809e-03 | No         |
| ## 3 Influenza vaccine        | 9.431129e-02 | Somewhat   | 2.126550e-02 | No         | 3.765656e-02 | Somewhat   |
| ## 4 shock                    | 3.964703e-02 | Somewhat   | 5.164118e-03 | No         | 4.618684e-04 | No         |
| ## 5 Health worker            | 7.215440e-02 | Somewhat   | 6.021809e-02 | Somewhat   | 9.813392e-03 | No         |
| ## 6 ACEI                     | 1.684165e-01 | Highly     | 6.080522e-03 | No         | 1.076237e-02 | No         |
| ## 7 ARB                      | 1.828984e-02 | No         | 2.404218e-04 | No         | 1.177667e-03 | No         |
| ## 8 asthma                   | 1.227356e-02 | No         | 2.533545e-04 | No         | 1.092745e-04 | No         |
| ## 9 COPD                     | 1.749341e-01 | Highly     | 7.302773e-02 | Somewhat   | 6.691157e-03 | No         |
| ## 10 Chronic Cardiac Disease | 6.204765e-02 | Somewhat   | 1.492305e-03 | No         | 2.960268e-05 | No         |
| ## 11 Chronic Renal Disease   | 1.738024e-01 | Highly     | 1.492305e-03 | No         | 1.146307e-02 | No         |
| ## 12 Hematological Disease   | 2.654456e-02 | No         | 3.754947e-03 | No         | 4.883194e-02 | Somewhat   |
| ## 13 Pregnancy               | 9.222784e-03 | No         | 1.283035e-02 | No         | 0.000000e+00 | No         |
| ## 14 Obesity                 | 3.637363e-02 | Somewhat   | 6.145638e-07 | No         | 2.066138e-04 | No         |
| ## 15 Diabetes                | 1.866242e-01 | Highly     | 5.704696e-03 | No         | 2.479443e-02 | No         |
| ## 16 HIV                     | 1.819062e-02 | No         | 4.376645e-03 | No         | 8.041982e-05 | No         |
| ## 17 Neuromuscular Disease   | 3.325893e-02 | Somewhat   | 4.106090e-03 | No         | 4.524557e-03 | No         |
| ## 18 Autoimmune Disease      | 1.319137e-05 | No         | 7.433381e-03 | No         | 3.870564e-03 | No         |
| ## 19 Coronary Disease        | 1.340642e-01 | Highly     | 2.627084e-03 | No         | 1.221929e-01 | Highly     |
| ## 20 Hypertension            | 2.210587e-01 | Highly     | 1.186944e-02 | No         | 1.223492e-02 | No         |
| ## 21 Infiltrates chest x-ray | 2.817873e-02 | No         | 1.564487e-01 | Highly     | 3.578773e-02 | Somewhat   |
| ## 22 Corticosteroids         | 1.229703e-03 | No         | 1.560437e-04 | No         | 1.635793e-03 | No         |
| ## 23 Antibiotics             | 6.889626e-03 | No         | 3.134299e-03 | No         | 2.975869e-04 | No         |
| ## 24 Empiric treatment       | 5.959459e-03 | No         | 4.937022e-03 | No         | 2.287937e-03 | No         |
| ## 25 Lopinavir/ritonavir     | 1.598323e-03 | No         | 5.711297e-02 | Somewhat   | 1.005827e-04 | No         |
| ## 26 interferon beta-1       | 2.656602e-02 | No         | 2.371890e-02 | No         | 8.530341e-03 | No         |
| ## 27 Hydroxychloroquine      | 4.276412e-02 | Somewhat   | 2.599639e-04 | No         | 3.468705e-02 | Somewhat   |
| ## 28 Tocilizumab             | 1.916296e-02 | No         | 2.610744e-03 | No         | 1.415470e-02 | No         |
| ## 29 O2                      | 2.146274e-05 | No         | 3.402079e-02 | Somewhat   | 4.340230e-03 | No         |
| ## 30 HFNC                    | 2.353027e-03 | No         | 7.516552e-04 | No         | 1.157880e-03 | No         |
| ## 31 NIV                     | 1.070219e-02 | No         | 3.063022e-02 | Somewhat   | 3.737383e-05 | No         |
| ## 32 MV                      | 3.057185e-03 | No         | 1.653186e-01 | Highly     | 2.370305e-08 | No         |
| ## 33 Myocardial Dysfunction  | 2.228904e-01 | Highly     | 6.177601e-02 | Somewhat   | 6.055540e-02 | Somewhat   |
| ## 34 Acute Kidney injury     | 6.306028e-01 | Highly     | 3.646921e-01 | Highly     | 2.337694e-01 | Highly     |
| ## 35 Age                     | 6.513748e-01 | Highly     | 7.408417e-01 | Highly     | 4.622984e-01 | Highly     |
| ## 36 APACHE II               | 4.310389e-01 | Highly     | 2.986345e-01 | Highly     | 2.939476e-01 | Highly     |
| ## 37 SOFA                    | 4.038444e-01 | Highly     | 2.953304e-01 | Highly     | 1.487510e-01 | Highly     |
| ## 38 Lactate dehydrogenase   | 5.366081e-02 | Somewhat   | 1.041057e-01 | Highly     | 3.504073e-02 | Somewhat   |
| ## 39 WBC                     | 4.581520e-02 | Somewhat   | 2.181871e-03 | No         | 3.820653e-02 | Somewhat   |
| ## 40 Creatinine              | 5.615214e-01 | Highly     | 2.412052e-01 | Highly     | 9.217995e-02 | Somewhat   |
| ## 41 CRP                     | 7.164503e-02 | Somewhat   | 8.547374e-02 | Somewhat   | 3.204018e-03 | No         |
| ## 42 PCT                     | 3.048025e-01 | Highly     | 8.008344e-02 | Somewhat   | 0.000000e+00 | No         |
| ## 43 Lactate                 | 6.190517e-02 | Somewhat   | 1.543924e-01 | Highly     | 2.290830e-01 | Highly     |
| ## 44 D Dimer                 | 2.521748e-01 | Highly     | 4.644420e-01 | Highly     | 8.243056e-02 | Somewhat   |
| ## 45 Ferritin                | 4.180265e-01 | Highly     | 3.490296e-01 | Highly     | 1.818192e-01 | Highly     |
| ## 46 Gap antiviral           | 2.766619e-01 | Highly     | 0.000000e+00 | No         | 0.000000e+00 | No         |
| ## 47 PaO2/FiO2               | 0.000000e+00 | No         | 0.000000e+00 | No         | 1.018619e-01 | Highly     |
| ## 48 Gap diagnostic          | 0.000000e+00 | No         | 0.000000e+00 | No         | 0.000000e+00 | No         |
| ## 49 Gap ICU                 | 6.204765e-02 | Somewhat   | 0.000000e+00 | No         | 7.482980e-02 | Somewhat   |

Procalcitonin; GAP antiviral: Time from the symptoms onset to the first dose of antiviral, GAP diagnostic: Time from the symptoms onset to diagnosis, GAP ICU: time from the symptoms onset to ICU admission. )



Patients with the cluster A phenotype (mild COVID-19 disease) had <65 years, lower severity of illness, fewer abnormal laboratory values and less development of complications, with a crude ICU mortality of 20.3%; those with the cluster B phenotype (moderate COVID-19 disease) had similar characteristics as seen in the A phenotype but were more likely to present shock at ICU admission with a crude ICU-mortality of 25.5%. Patients with the cluster C phenotype (severe COVID-19 disease) had >65 years, a high level of severity of illness, more likely to have elevated measures of inflammation (e.g. D dimer, LDH and ferritin), high frequency of shock, AKI and myocardial dysfunction, with a crude ICU mortality of 45.4%

A detailed description of the development and analysis of clusters can be found in the original paper (3).

## References

- 1.-Rousseeuw, P.J. (1987) Silhouettes: A graphical aid to the interpretation and validation of cluster analysis. *J. Comput. Appl. Math.* 1987; 20:53–65 [https://doi.org/10.1016/0377-0427\(87\)90125-7](https://doi.org/10.1016/0377-0427(87)90125-7)
- 2.- Van der Laan M, Pollard K, Bryan J. A new partitioning around medoids algorithm, *Journal of Statistical Computation and Simulation* 2003; 73:8, 575-584. <https://www.doi/10.1080/0094965031000136012>
- 3.- Rodríguez A, Ruiz-Botella M, Martín-Loeches I, et al. Deploying unsupervised clustering analysis to derive clinical phenotypes and risk factors associated with mortality risk in 2022 critically ill patients with COVID-19 in Spain. *Crit Care.* 2021;25:63. doi:10.1186/s13054-021-03487-8

ACEI: Angiotensin Converting Enzyme Inhibitors; ARB: Angiotensin receptor blockers; WBC: White blood cells; HFNC: High Flow nasal cannula, NIV: non-invasive ventilation, MV: invasive mechanical ventilation, CRP: C-Reactive Protein; PCT: Procalcitonin ; GAP antiviral: Time from the symptoms onset to the first dose of antiviral, GAP diagnostic: Time from the symptoms onset to diagnosis, GAP ICU: time from the symptoms onset to ICU admission.

**e-Table 4:** Characteristics of whole population and different phenotypes according corticosteroid treatment

| Variable                                            | Whole Population<br>(n=2017)   |                                  | A Phenotype<br>(n= 537)         |                                 |             | B Phenotype<br>(n=623)           |                                 |              | C Phenotype<br>(n=857)           |                                 |              |
|-----------------------------------------------------|--------------------------------|----------------------------------|---------------------------------|---------------------------------|-------------|----------------------------------|---------------------------------|--------------|----------------------------------|---------------------------------|--------------|
|                                                     | Corticosteroid=<br>NO<br>n=846 | Corticosteroid=<br>YES<br>n=1171 | Corticosteroid =<br>NO<br>n=239 | Corticosteroid=<br>YES<br>n=298 | p-<br>value | Corticosteroid =<br>NO<br>n= 285 | Corticosteroid=<br>YES<br>n=338 | p-<br>value  | Corticosteroid =<br>NO<br>n= 322 | Corticosteroid=<br>YES<br>n=535 | p-<br>value  |
| General characteristics and severity of illness     |                                |                                  |                                 |                                 |             |                                  |                                 |              |                                  |                                 |              |
| Age, median (p25-75), year                          | 65(55-72)                      | 64(56-88)                        | 63(53-69)                       | 63(54-71)                       | 0.61        | 64(50-73)                        | 63(55-71)                       | 0.71         | 66(58-73)                        | 65(58-71)                       | 0.05         |
| Male, n(%)                                          | 582(68.8)                      | 837(71.5)                        | 163 (68.2)                      | 214(71.8)                       | 0.41        | 189(66.3)                        | 227(67.2)                       | 0.89         | 230(71.4)                        | 396(74.0)                       | 0.45         |
| APACHE II <sup>b</sup> , median (p25-75),           | 14(11-18)                      | 14(11-18)                        | 12(9-16)                        | 11.5(9-15)                      | 0.39        | 13(10-17)                        | 12(10-16)                       | 0.36         | 17(14-22)                        | 17(14-21)                       | 0.24         |
| SOFA <sup>c</sup> , median(p25-75),                 | 5.0(3-7)                       | 5.7(4-8)                         | 4(3-5)                          | 4(3-5)                          | 0.61        | 5(3-7)                           | 5(3-6)                          | 0.88         | 7(5-9)                           | 7(6-8)                          | 0.95         |
| GAP diagnosis <sup>d</sup> , median(p25-75),        | 6(4-9)                         | 7(4-9)                           | 7 (5-9)                         | 6.6(4-8)                        | 0.35        | 6(4-8)                           | 6(3-8)                          | 0.89         | 6(4-8)                           | 7(5-8)                          | 0.01         |
| Laboratory findings                                 |                                |                                  |                                 |                                 |             |                                  |                                 |              |                                  |                                 |              |
| D-lactate dehydrogenase, median (p25-75), U/L       | 509(405-640)                   | 570(434-765)***                  | 478(381-547)                    | 463(359-576)                    | 0.49        | 451(358-543)                     | 492(400-587)                    | <b>0.001</b> | 605(504-800)                     | 708(576-990)                    | <b>0.001</b> |
| White blood cell, median (p25-75), x10 <sup>9</sup> | 8.3(6.0-11.6)                  | 9.2(6.4-12.8)***                 | 7.2(5.6-10.2)                   | 8.3(6.0-10.2)                   | <b>0.04</b> | 8.2(5.8-10.8)                    | 9.2(6.2-12.4)                   | <b>0.005</b> | 9.6(6.7-12.7)                    | 10.2(7.0-14.0)                  | 0.08         |
| Serum creatinine, median (p25-75), mg/dL            | 0.88(0.70-1.16)                | 0.85(0.70-1.12)                  | 0.80(0.66-1.03)                 | 0.80(0.66-1.01)                 | 0.98        | 0.82(0.65-1.02)                  | 0.79(0.66-0.97)                 | 0.36         | 1.0(0.78-1.36)                   | 0.98(0.74-1.37)                 | 0.22         |
| C-Reactive Protein , median (p25-75), mg/dL         | 15.7(9.8-24)                   | 15.3(8.9-25.0)                   | 15(9-21)                        | 14(7-22)                        | 0.36        | 14.5(8.7-21.4)                   | 14.4(8.0-23.0)                  | 0.82         | 18(11-27)                        | 18(10-26)                       | 0.25         |
| Procalcitonin, median (p25-75), ng/mL               | 0.33-(0.15-0.85)               | 0.31(0.14-0.87)                  | 0.29(0.14-0.60)                 | 0.27(0.10-0.68)                 | 0.36        | 0.21(0.12-0.62)                  | 0.23(0.10-0.50)                 | 0.67         | 0.61(0.24-1.39)                  | 0.50(0.20-1.30)                 | 0.06         |
| Serum lactate, median (p25-75), mmol/L              | 1.5(1.1-2.0)                   | 1.6(1.2-2.2)*                    | 1.5(1.2-1.9)                    | 1.5(1.1-2.0)                    | 0.94        | 1.3(1.0-1.8)                     | 1.5(1.1-2.0)                    | <b>0.002</b> | 1.6(1.2-2.1)                     | 1.7(1.3-2.2)                    | 0.32         |
| D dimer, median (p25-75), ng/mL                     | 1590(720-3880)                 | 1700(723-5990)                   | 1160(592-2025)                  | 1058(571-2370)                  | 0.87        | 1340(670-2830)                   | 1305(615-3980)                  | 0.55         | 2200(1000-4846)                  | 2330(1023-5099)                 | 0.30         |
| Ferritin, median (p25-75), ng/mL                    | 1577(1300-2150)                | 1668(1300-2300)*                 | 1509(1264-1825)                 | 1596(1300-2038)                 | <b>0.03</b> | 1528(1267-1829)                  | 1580(1276-2016)                 | 0.27         | 1780(1445-2290)                  | 1860(1375-2440)                 | 0.37         |
| Coexisting condition and comorbidities              |                                |                                  |                                 |                                 |             |                                  |                                 |              |                                  |                                 |              |
| Arterial hypertension, n(%)                         | 283(33.4)                      | 526(44.9)                        | 90(37.7)                        | 121(40.6)                       | 9.54        | 83(29.1)                         | 90(26.6)                        | 0.54         | 233(72.4)                        | 315(58.9)                       | <b>0.001</b> |
| Obesity (BMI>30), n(%)                              | 278(32.8)                      | 375(32.0)                        | 80(33.5)                        | 79(26.5)                        | 0.09        | 88(30.9)                         | 112(33.1)                       | 0.60         | 110(34.2)                        | 184(34.4)                       | 1.00         |
| Diabetes, n(%)                                      | 171(20.2)                      | 247(21.0)                        | 44(18.4)                        | 68(22.8)                        | 0.25        | 56(19.6)                         | 52(15.4)                        | 0.19         | 71(22.0)                         | 127(23.7)                       | 0.62         |
| Coronary arterial disease, n(%)                     | 52(6.1)                        | 72(6.1)                          | 10(4.2)                         | 25(8.4)                         | 0.07        | 22(7.7)                          | 19(5.6)                         | 0.37         | 20(6.2)                          | 28(5.2)                         | 0.65         |
| COPD, n(%)                                          | 66(7.8)                        | 82(7.0)                          | 16(6.7)                         | 21(7.0)                         | 1.00        | 19(6.7)                          | 19(5.6)                         | 0.70         | 31(9.6)                          | 42(7.9)                         | 0.43         |
| Chronic renal disease, n(%)                         | 35(4.1)                        | 50(4.2)                          | 12(5.0)                         | 19(6.4)                         | 0.62        | 4(1.4)                           | 6(1.8)                          | 0.96         | 19(5.9)                          | 25(4.7)                         | 0.52         |
| Hematologic disease, n(%)                           | 36(4.2)                        | 36(3.0)                          | 12(5.0)                         | 8(2.7)                          | 0.23        | 12(4.2)                          | 10(3.0)                         | 0.53         | 12(3.7)                          | 18(3.4)                         | 0.93         |
| Asthma, n(%)                                        | 43(5.0)                        | 77(6.6)                          | 13(5.4)                         | 28(9.4)                         | 0.12        | 21(7.4)                          | 24(7.1)                         | 1.00         | 9(2.8)                           | 25(4.7)                         | 0.23         |
| HIV, n(%)                                           | 3(0.3)                         | 2(0.1)                           | 1(0.4)                          | 1(0.3)                          | 1.00        | 1(0.4)                           | 0(0.0)                          | 0.93         | 1(0.3)                           | 1(0.2)                          | 1.00         |
| Pregnancy, n(%)                                     | 3(0.3)                         | 1(0.08)                          | 0(0.0)                          | 1(0.3)                          | 1.00        | 3(1.1)                           | 0(0.0)                          | 0.19         | 0(0.0)                           | 0(0.0)                          | NA           |
| Autoimmune disease, n(%)                            | 29(3.4)                        | 46(3.9)                          | 5(2.1)                          | 15(5.0)                         | 0.11        | 11(3.9)                          | 7(2.1)                          | 0.27         | 13(4.0)                          | 23(4.3)                         | 0.99         |
| Chronic heart disease, n(%)                         | 36(4.2)**                      | 21(1.8)                          | 14(5.9)                         | 7(2.3)                          | 0.06        | 8(2.8)                           | 2(0.6)                          | 0.06         | 14(4.3)                          | 12(2.2)                         | 0.12         |
| Neuromuscular disease, n(%)                         | 10(1.2)                        | 6(0.51)                          | 2(0.8)                          | 1(0.3)                          | 0.84        | 4(1.4)                           | 1(0.3)                          | 0.27         | 4(1.2)                           | 4(0.7)                          | 0.71         |
| Oxygenation and ventilator support                  |                                |                                  |                                 |                                 |             |                                  |                                 |              |                                  |                                 |              |
| Oxygen mask, n(%)                                   | 171(20.2)***                   | 154(13.1)                        | 61(25.5)                        | 63(21.1)                        | 0.27        | 68(23.9)                         | 37(10.9)                        | <b>0.001</b> | 42(13)                           | 54(10.1)                        | 0.22         |
| High flow nasal cannula, n(%)                       | 169(19.9)                      | 206(24.3)                        | 152(63.6)                       | 193(64.8)                       | 0.84        | 2(0.7)                           | 1(0.3)                          | 0.88         | 15(4.7)                          | 12(2.2)                         | 0.07         |
| Non-invasive ventilation, n(%)                      | 47(5.5)                        | 93(7.9)                          | 21(8.8)                         | 43(14.4)                        | 0.06        | 8(2.8)                           | 18(5.3)                         | 0.17         | 18(5.6)                          | 32(6.0)                         | 0.93         |
| Invasive mechanical ventilation, n(%)               | 453(53.5)                      | 719(61.4)***                     | 2(0.8)                          | 1(0.3)                          | 0.84        | 200(70.2)                        | 275(81.4)                       | <b>0.002</b> | 251(78.0)                        | 443(82.8)                       | 0.09         |
| PaO2/FiO2, median (p25-75),                         | 130(100-170)                   | 130(93-162) **                   | 116(81-136)                     | 106(83-130)                     | 0.13        | 167(148-220)                     | 162(135-209)                    | 0.05         | 124(88-157)                      | 126(88-154)                     | 0.54         |
| Complications and outcome                           |                                |                                  |                                 |                                 |             |                                  |                                 |              |                                  |                                 |              |
| Shock, n(%)                                         | 359(42.4)                      | 545(46.5)                        | 24(10)                          | 32(10.7)                        | 0.90        | 95(33.3)                         | 101(29.9)                       | 0.40         | 240(74.5)                        | 412(77.0)                       | 0.45         |
| AKI, n(%)                                           | 252(29.8)                      | 327(27.9)                        | 54(22.6)                        | 57(19.1)                        | 0.38        | 54(18.9)                         | 64(18.9)                        | 1.00         | 144(44.7)                        | 206(38.5)                       | 0.08         |
| Myocardial dysfunction, n(%)                        | 89(10.5)                       | 80(6.8)                          | 17(7.1)                         | 13(4.4)                         | 0.23        | 28(9.8)                          | 15(4.4)                         | <b>0.01</b>  | 44(13.7)                         | 52(9.7)                         | 0.09         |
| >2 quadrant infiltrates in chest x-ray, n(%)        | 542(64.0)                      | 788(67.2)                        | 141(58.9)                       | 203(68.1)                       | <b>0.02</b> | 179(62.8)                        | 234(69.2)                       | 0.09         | 222(68.9)                        | 351(65.6)                       | 0.31         |
| Ventilator associated pneumonia n(%)                | 116(13.7)                      | 210(17.9)                        | 35(14.6)                        | 38(12.8)                        | 0.61        | 34(11.9)                         | 63(18.6)                        | <b>0.02</b>  | 47(14.6)                         | 109(20.4)                       | <b>0.04</b>  |
| ICU LOS, median(p25-75)                             | 13(5.4-23)                     | 15(9.0-27)***                    | 12(5-26)                        | 11(6-21)                        | 0.65        | 13(5-20)                         | 14(8-25)                        | <b>0.001</b> | 15(7.0-24.0)                     | 19(11-30)                       | <b>0.001</b> |
| ICU crude mortality, n(%)                           | 261(30.8)                      | 396(33.8)                        | 47(19.7)                        | 62(20.8)                        | 0.82        | 72(25.3)                         | 87(25.7)                        | 0.96         | 142(44.1)                        | 247(46.2)                       | 0.60         |

**e-Figure 1:** Mean differences plot of variables before and after propensity full matching

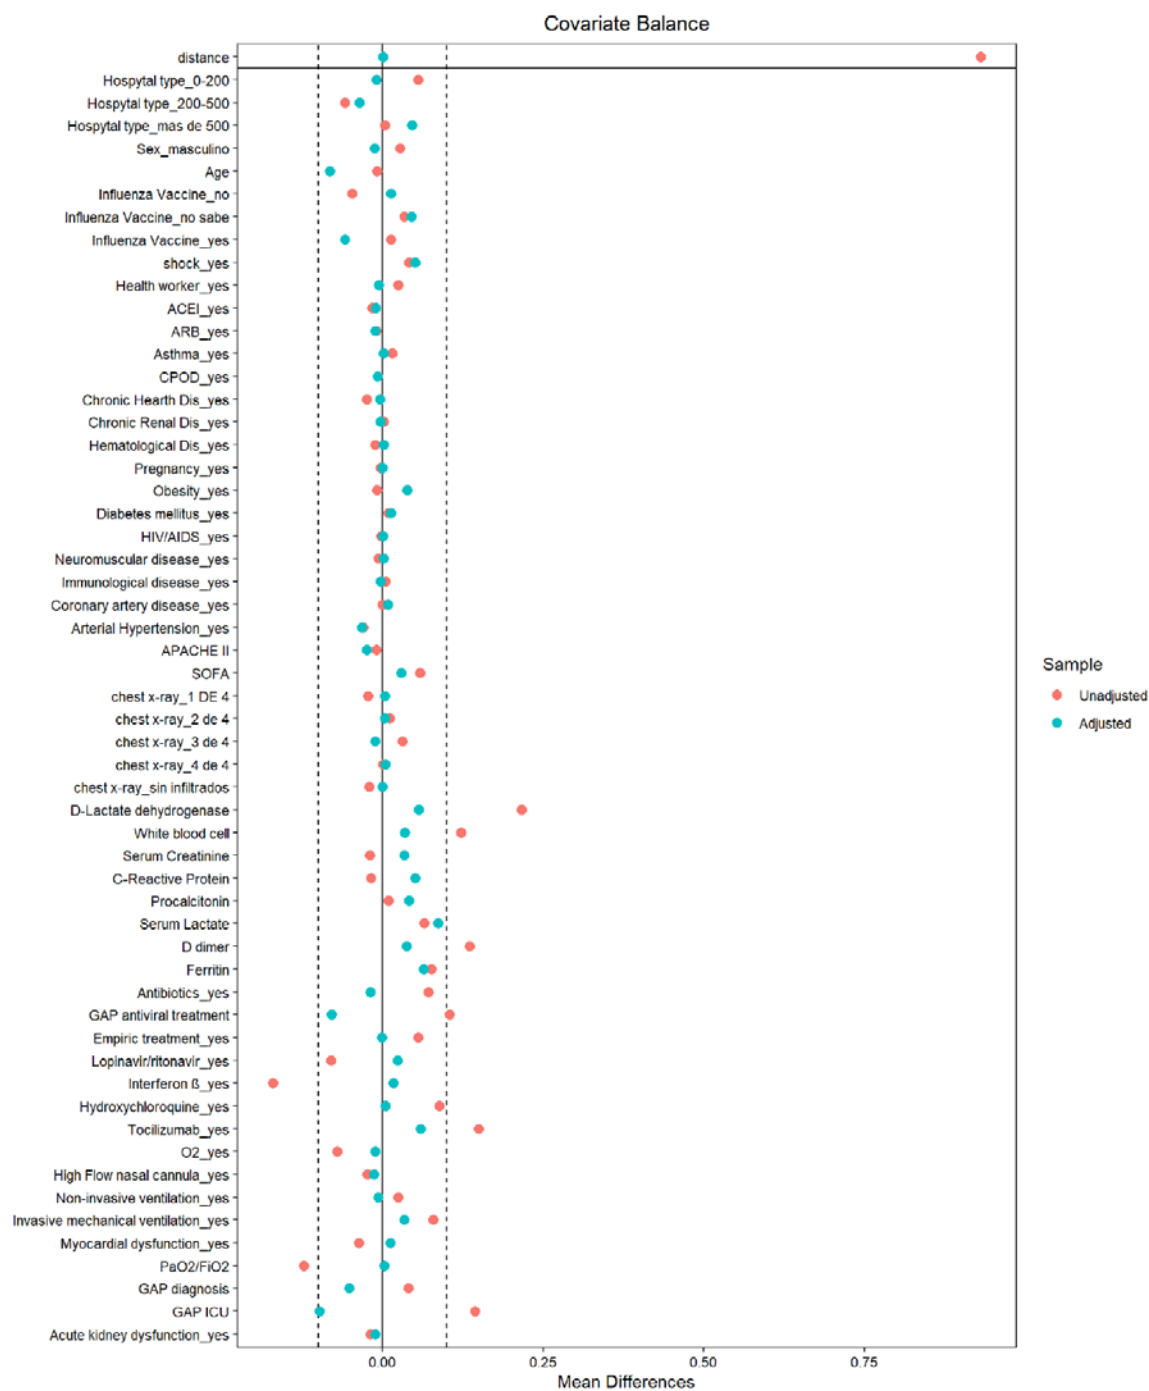

**e-Table 5:** Forest plot of variables associated with ICU mortality in the multivariate analysis in whole population

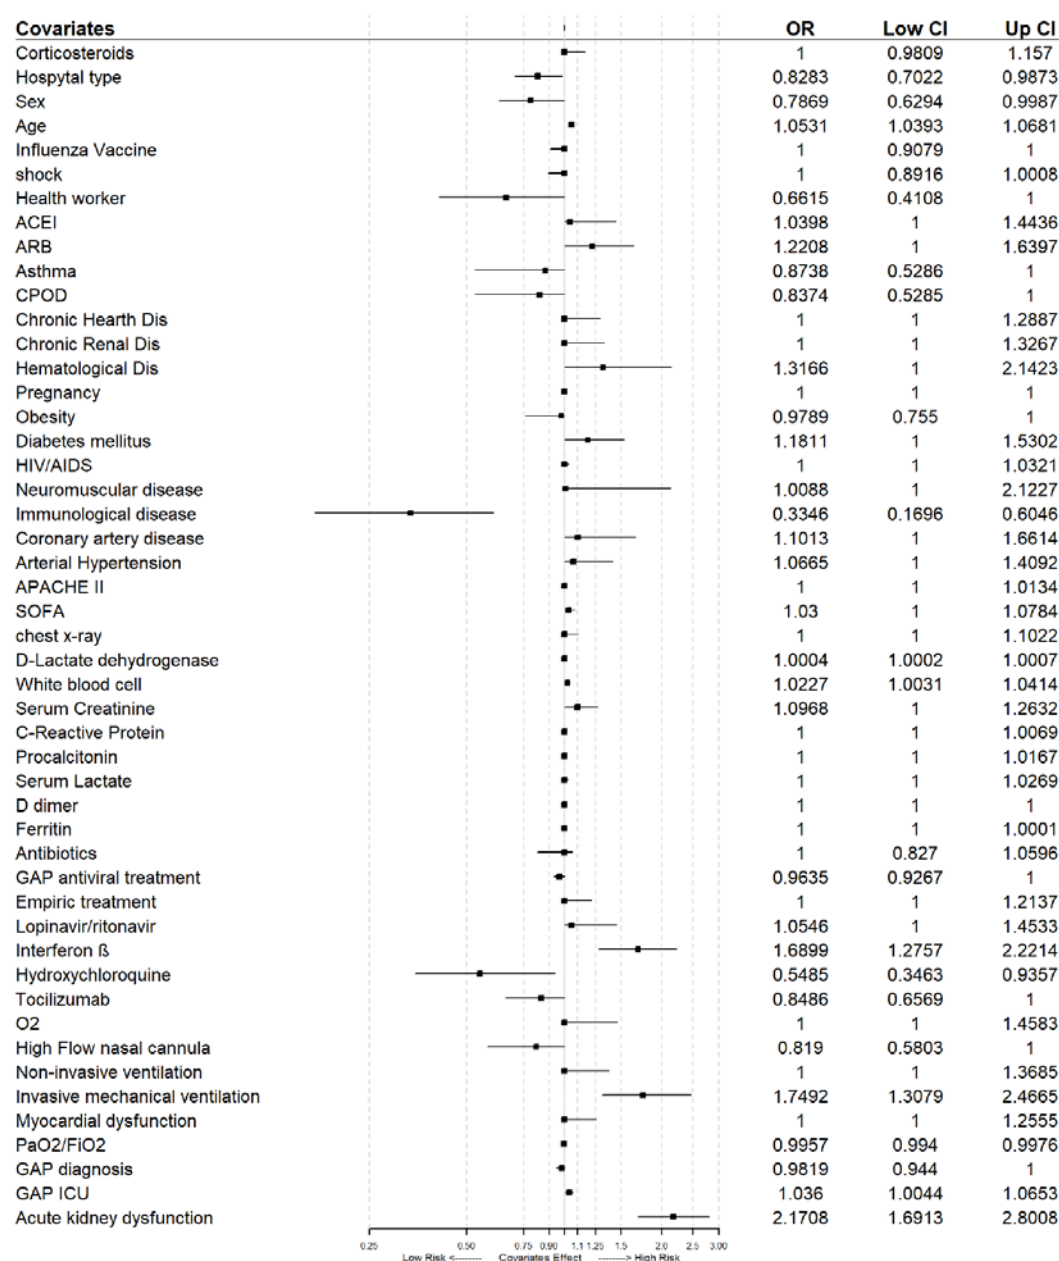

**e-Figure 2:** Area under ROC curve for ICU mortality multivariate model in the whole population

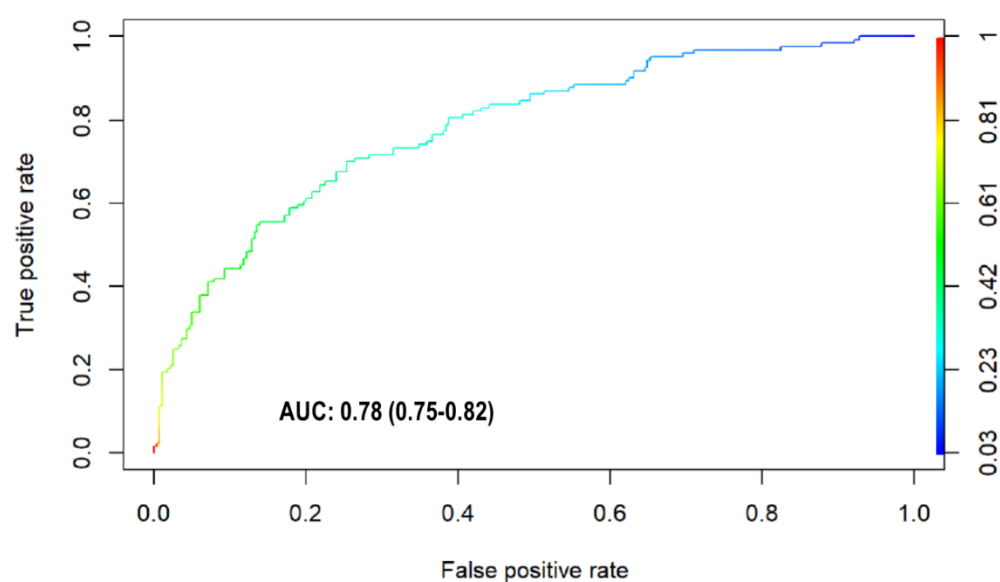

**e-Table 6:** Characteristics of 537 A phenotype patients according to ICU mortality

| Variable <sup>a</sup>                                  | Survivors n=428 | Non- survivors n=109 | p-value      |
|--------------------------------------------------------|-----------------|----------------------|--------------|
| <b>General characteristics and severity of illness</b> |                 |                      |              |
| Age, median (p25-75), year                             | 60.5(51-68)     | 70(64-74)            | <b>0.001</b> |
| Male, n(%)                                             | 300 (70.1)      | 77(70.6)             | 1.00         |
| APACHE II <sup>b</sup> , median (p25-75),              | 11(8-15)        | 15(11-18)            | <b>0.001</b> |
| SOFA <sup>c</sup> , median(p25-75),                    | 3(3-5)          | 5(3-7)               | <b>0.001</b> |
| <b>Laboratory findings</b>                             |                 |                      |              |
| D-lactate dehydrogenase, median (p25-75), U/L          | 467(369-549)    | 488(384-582)         | 0.07         |
| White blood cell, median (p25-75), x10 <sup>9</sup>    | 7.6(5.8-10.2)   | 8.0(5.8-10.8)        | 0.93         |
| Serum creatinine, median (p25-75), mg/dL               | 0.79(0.64-0.94) | 0.96(0.77-1.42)      | <b>0.001</b> |
| C-Reactive Protein, median (p25-75), mg/dL             | 14(7-22)        | 15 (10-22.7)         | 0.09         |
| Procalcitonin, median (p25-75), ng/mL                  | 0.25(0.10-0.53) | 0.55(0.20-1.28)      | <b>0.001</b> |
| Serum lactate, median (p25-75), mmol/L                 | 1.5(1.1-1.9)    | 1.7(1.2-2.2)         | <b>0.03</b>  |
| D dimer, median (p25-75), ng/mL                        | 1960(512-1965)  | 1620(875-3770)       | <b>0.001</b> |
| Ferritin, median (p25-75), ng/mL                       | 1500(1260-1820) | 1820(1390-2190)      | <b>0.001</b> |
| <b>Coexisting condition and comorbidities</b>          |                 |                      |              |
| Arterial hypertension, n(%)                            | 148(34.6)       | 63(57.8)             | <b>0.001</b> |
| Obesity (BMI>30), n(%)                                 | 119(27.8)       | 40(36.7)             | 0.08         |
| Diabetes, n(%)                                         | 73(17.1)        | 39(35.8)             | <b>0.001</b> |
| Coronary arterial disease, n(%)                        | 19(4.4)         | 16(14.7)             | <b>0.001</b> |
| COPD, n(%)                                             | 19(4.4)         | 18(16.5)             | <b>0.001</b> |
| Chronic renal disease, n(%)                            | 15(3.5)         | 16(14.7)             | <b>0.001</b> |
| Hematologic disease, n(%)                              | 13(3.0)         | 7(6.4)               | 0.16         |
| Asthma, n(%)                                           | 30(7.0)         | 11(10.1)             | 0.37         |
| HIV, n(%)                                              | 2(0.5)          | 0(0.0)               | 1.00         |
| Pregnancy, n(%)                                        | 1(0.2)          | 0(0.0)               | 1.00         |
| Autoimmune disease, n(%)                               | 16(3.7)         | 4(3.7)               | 1.00         |
| Chronic heart disease, n(%)                            | 12(2.8)         | 9(8.3)               | <b>0.01</b>  |
| Neuromuscular disease, n(%)                            | 1(0.2)          | 1(0.3)               | 0.84         |
| <b>Oxygenation and ventilator support</b>              |                 |                      |              |
| Oxygen mask, n(%)                                      | 99(23.1)        | 25(22.9)             | 1.00         |
| High flow nasal cannula, n(%)                          | 277(64.7)       | 68(62.4)             | 0.73         |
| Non-invasive ventilation, n(%)                         | 48(11.2)        | 16(14.7)             | 0.40         |
| Invasive mechanical ventilation, n(%)                  | 2(0.5)          | 1(0.9)               | 1.00         |
| PaO <sub>2</sub> /FiO <sub>2</sub> , median (p25-75),  | 114(85-136)     | 98(70-122)           | <b>0.001</b> |
| <b>Treatment</b>                                       |                 |                      |              |
| Corticosteroids, n(%)                                  | 236(55.1)       | 62(56.9)             | 0.82         |
| Antibiotics, n(%)                                      | 370(86.4)       | 91(83.5)             | 0.52         |
| Lopinavir/ritonavir, n(%)                              | 359(83.9)       | 93(85.3)             | 0.82         |
| Hydroxychloroquine, No.(%)                             | 396(92.5)       | 94(86.2)             | 0.06         |
| Tocilizumab, No.(%)                                    | 107(25.0)       | 21(19.3)             | 0.25         |
| Interferon $\beta$ , No.(%)                            | 143(33.4)       | 45(41.3)             | 0.15         |
| <b>Complications and Outcome</b>                       |                 |                      |              |
| Shock, n(%)                                            | 39(9.1)         | 17(15.6)             | 0.08         |
| AKI, n(%)                                              | 58(13.6)        | 53(48.6)             | <b>0.001</b> |
| Myocardial dysfunction, n(%)                           | 13(3.0)         | 17(15.6)             | <b>0.001</b> |
| >2 quadrant infiltrates in chest x-ray, n(%)           | 271(63.3)       | 73(66.9)             | 0.50         |
| LOS UCI, median (p25-75), days                         | 11(5.7-22)      | 14.5(7-29)           | 0.10         |

Abbreviations: (p25-75): percentile range; APACHE II, Acute Physiology and Chronic Health Evaluation II; SOFA, Sequential Organ Failure Assessment; BMI, body mass index; COPD, Chronic obstructive pulmonary disease; HIV, human immunodeficiency viruses; PaO<sub>2</sub>/FiO<sub>2</sub>, Partial pressure arterial oxygen/ fraction of inspired oxygen

a Corresponds to minimum or maximum value, as appropriate, within 12 hours of ICU admission. The variables in this Table were not transformed for your comparison.

b APACHE II score to the severity of illness, the score is obtained by adding the following components 1) 12 clinical and laboratory variables each with a score range of 0 to 4 points (APS). The APS is determined from the worst physiologic values during the initial 24 h after ICU admission, 2) age with a range 0 to 6 points and 3) Chronic health points if the patients has history of severe organ system insufficiency or is immunocompromised assign 5 points if the patients is no operative or emergency postoperative and 2 points for elective postoperative patients with a total score range of 0 to 71.

c SOFA score corresponds to the severity of organ dysfunction, reflecting six organ systems each with a score range of 0 to 4 points (cardiovascular, hepatic, hematologic, respiratory, neurological, renal), with a total score range of 0 to 24,

**e-Figure 3:** Unadjusted survival plot (Kaplan-Meier) for A phenotype patients according to corticosteroids treatment (cortis)

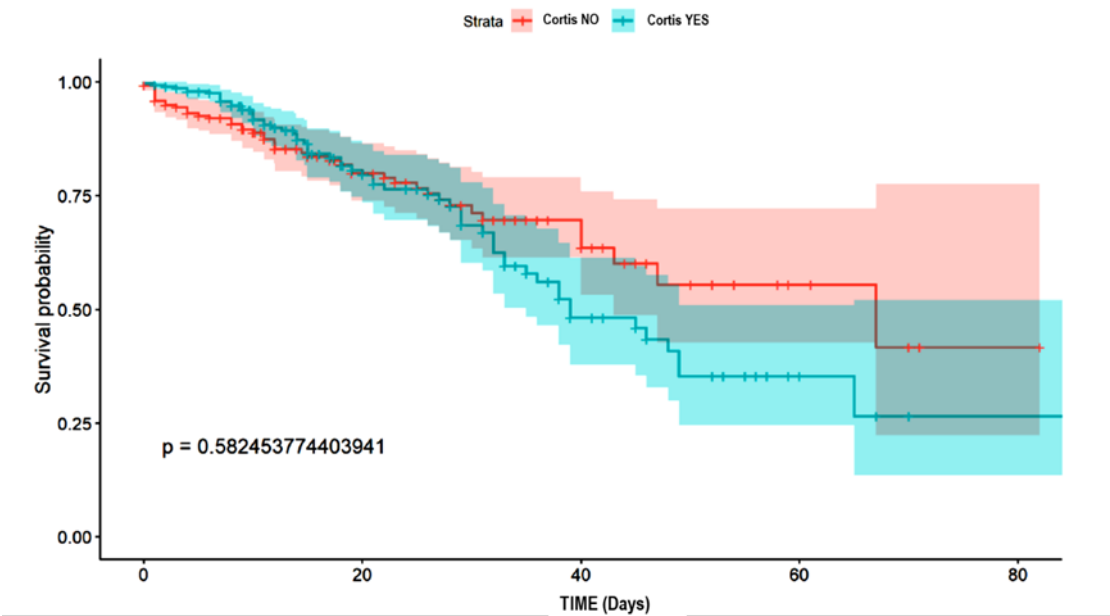

**e-Table 7:** Ranking of variables according to the information value to select important variables in each phenotype. Variables highlighted in red were included in each model.

| Variables                     | A Phenotype  |            | B Phenotype  |            | C Phenotype  |            |
|-------------------------------|--------------|------------|--------------|------------|--------------|------------|
|                               | IV           | PREDICTIVE | IV           | PREDICTIVE | IV           | PREDICTIVE |
| ## 1 Hospital type            | 9.132863e-03 | No         | 1.559446e-03 | No         | 2.944340e-02 | No         |
| ## 2 Male                     | 1.444146e-04 | No         | 2.590207e-02 | No         | 3.869809e-03 | No         |
| ## 3 Influenza vaccine        | 9.431129e-02 | Somewhat   | 2.126550e-02 | No         | 3.765656e-02 | Somewhat   |
| ## 4 shock                    | 3.964703e-02 | Somewhat   | 5.164118e-03 | No         | 4.618684e-04 | No         |
| ## 5 Health worker            | 7.215440e-02 | Somewhat   | 6.021809e-02 | Somewhat   | 9.813392e-03 | No         |
| ## 6 ACEI                     | 1.684165e-01 | Highly     | 6.080522e-03 | No         | 1.076237e-02 | No         |
| ## 7 ARB                      | 1.828984e-02 | No         | 2.404218e-04 | No         | 1.177667e-03 | No         |
| ## 8 asthma                   | 1.227356e-02 | No         | 2.533545e-04 | No         | 1.092745e-04 | No         |
| ## 9 COPD                     | 1.749341e-01 | Highly     | 7.302773e-02 | Somewhat   | 6.691157e-03 | No         |
| ## 10 Chronic Cardiac Disease | 6.204765e-02 | Somewhat   | 1.492305e-03 | No         | 2.960268e-05 | No         |
| ## 11 Chronic Renal Disease   | 1.738024e-01 | Highly     | 1.492305e-03 | No         | 1.146307e-02 | No         |
| ## 12 Hematological Disease   | 2.654456e-02 | No         | 3.754947e-03 | No         | 4.883194e-02 | Somewhat   |
| ## 13 Pregnancy               | 9.222784e-03 | No         | 1.283035e-02 | No         | 0.000000e+00 | No         |
| ## 14 Obesity                 | 3.637363e-02 | Somewhat   | 6.145638e-07 | No         | 2.066138e-04 | No         |
| ## 15 Diabetes                | 1.866242e-01 | Highly     | 5.704696e-03 | No         | 2.479443e-02 | No         |
| ## 16 HIV                     | 1.819062e-02 | No         | 4.376645e-03 | No         | 8.041982e-05 | No         |
| ## 17 Neuromuscular Disease   | 3.325893e-02 | Somewhat   | 4.106090e-03 | No         | 4.524557e-03 | No         |
| ## 18 Autoimmune Disease      | 1.319137e-05 | No         | 7.433381e-03 | No         | 3.870564e-03 | No         |
| ## 19 Coronary Disease        | 1.340642e-01 | Highly     | 2.627084e-03 | No         | 1.221929e-01 | Highly     |
| ## 20 Hypertension            | 2.210587e-01 | Highly     | 1.186944e-02 | No         | 1.223492e-02 | No         |
| ## 21 Infiltrates chest x-ray | 2.817873e-02 | No         | 1.564487e-01 | Highly     | 3.578773e-02 | Somewhat   |
| ## 22 Corticosteroids         | 1.229703e-03 | No         | 1.560437e-04 | No         | 1.635793e-03 | No         |
| ## 23 Antibiotics             | 6.889626e-03 | No         | 3.134299e-03 | No         | 2.975869e-04 | No         |
| ## 24 Empiric treatment       | 5.959459e-03 | No         | 4.937022e-03 | No         | 2.287937e-03 | No         |
| ## 25 Lopinavir/ritonavir     | 1.598323e-03 | No         | 5.711297e-02 | Somewhat   | 1.005827e-04 | No         |
| ## 26 interferon beta-1       | 2.656602e-02 | No         | 2.371890e-02 | No         | 8.530341e-03 | No         |
| ## 27 Hydroxychloroquine      | 4.276412e-02 | Somewhat   | 2.599639e-04 | No         | 3.468705e-02 | Somewhat   |
| ## 28 Tocilizumab             | 1.916296e-02 | No         | 2.610744e-03 | No         | 1.415470e-02 | No         |
| ## 29 O2                      | 2.146274e-05 | No         | 3.402079e-02 | Somewhat   | 4.340230e-03 | No         |
| ## 30 HFNC                    | 2.353027e-03 | No         | 7.516552e-04 | No         | 1.157880e-03 | No         |
| ## 31 NIV                     | 1.070219e-02 | No         | 3.063022e-02 | Somewhat   | 3.737383e-05 | No         |
| ## 32 MV                      | 3.057185e-03 | No         | 1.653186e-01 | Highly     | 2.370305e-08 | No         |
| ## 33 Myocardial Dysfunction  | 2.228904e-01 | Highly     | 6.177601e-02 | Somewhat   | 6.055540e-02 | Somewhat   |
| ## 34 Acute Kidney injury     | 6.306028e-01 | Highly     | 3.646921e-01 | Highly     | 2.337694e-01 | Highly     |
| ## 35 Age                     | 6.513748e-01 | Highly     | 7.408417e-01 | Highly     | 4.622984e-01 | Highly     |
| ## 36 APACHE II               | 4.310389e-01 | Highly     | 2.986345e-01 | Highly     | 2.939476e-01 | Highly     |
| ## 37 SOFA                    | 4.038444e-01 | Highly     | 2.953304e-01 | Highly     | 1.487510e-01 | Highly     |
| ## 38 Lactate dehydrogenase   | 5.366081e-02 | Somewhat   | 1.041057e-01 | Highly     | 3.504073e-02 | Somewhat   |
| ## 39 WBC                     | 4.581520e-02 | Somewhat   | 2.181871e-03 | No         | 3.820653e-02 | Somewhat   |
| ## 40 Creatinine              | 5.615214e-01 | Highly     | 2.412052e-01 | Highly     | 9.217995e-02 | Somewhat   |
| ## 41 CRP                     | 7.164503e-02 | Somewhat   | 8.547374e-02 | Somewhat   | 3.204018e-03 | No         |
| ## 42 PCT                     | 3.048025e-01 | Highly     | 8.008344e-02 | Somewhat   | 0.000000e+00 | No         |
| ## 43 Lactate                 | 6.190517e-02 | Somewhat   | 1.543924e-01 | Highly     | 2.290830e-01 | Highly     |
| ## 44 D Dimer                 | 2.521748e-01 | Highly     | 4.644420e-01 | Highly     | 8.243056e-02 | Somewhat   |
| ## 45 Ferritin                | 4.180265e-01 | Highly     | 3.490296e-01 | Highly     | 1.818192e-01 | Highly     |
| ## 46 Gap antiviral           | 2.766619e-01 | Highly     | 0.000000e+00 | No         | 0.000000e+00 | No         |
| ## 47 PaO2/FiO2               | 0.000000e+00 | No         | 0.000000e+00 | No         | 1.018619e-01 | Highly     |
| ## 48 Gap diagnostic          | 0.000000e+00 | No         | 0.000000e+00 | No         | 0.000000e+00 | No         |
| ## 49 Gap ICU                 | 6.204765e-02 | Somewhat   | 0.000000e+00 | No         | 7.482980e-02 | Somewhat   |

ACEI: Angiotensin Converting Enzyme Inhibitors; ARB: Angiotensin receptor blockers; WBC: White blood cells; HFNC: High Flow nasal cannula, NIV: non-invasive ventilation, MV: invasive mechanical ventilation, CRP: C-Reactive Protein; PCT: Procalcitonin; GAP antiviral: Time from the symptoms onset to the first dose of antiviral, GAP diagnostic: Time from the symptoms onset to diagnosis, GAP ICU: time from the symptoms onset to ICU admission.



**e-Figure 4:** Competing risk analysis (Fine and Grey) for A Phenotype patient’s

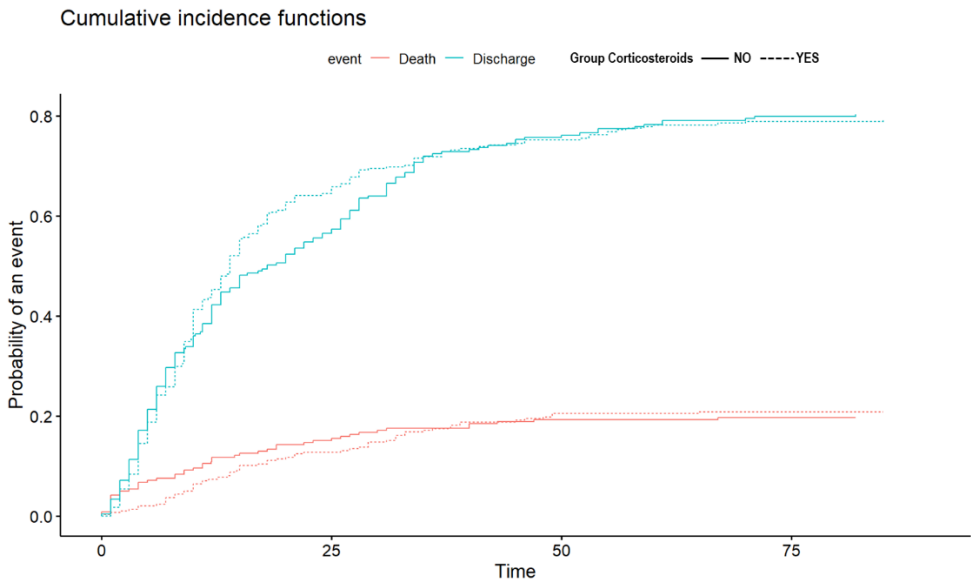

**e-Table 8:** Factors associated with ICU mortality in Cox Hazard regression analysis for patients among A phenotype

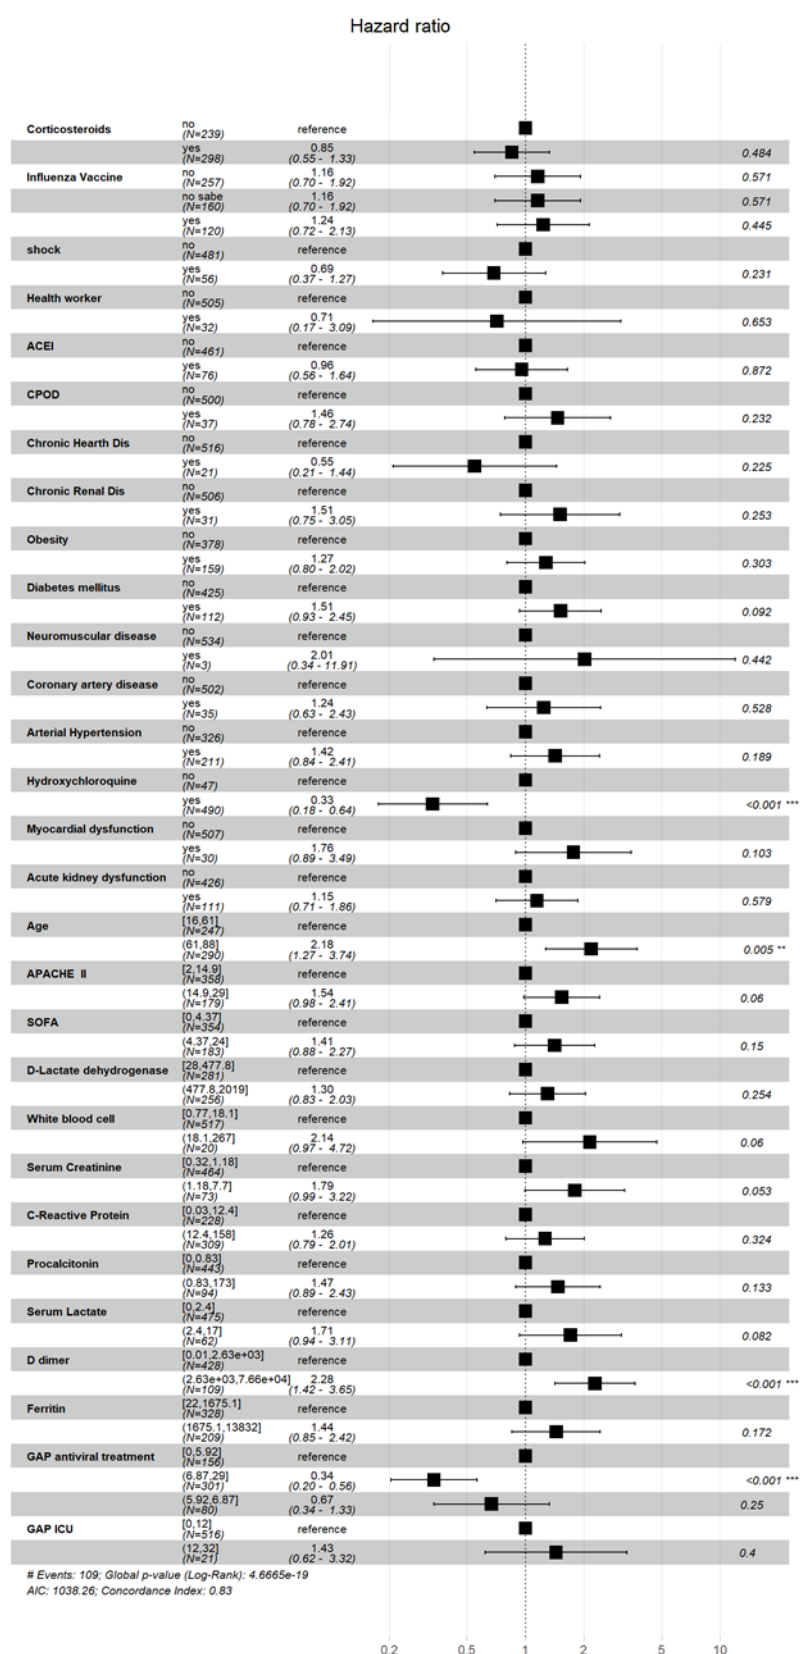

**e-Table 9:** Factors associated with corticosteroids use in A phenotype patients'

| Variable                        |             | N   | Odds ratio        | p    |
|---------------------------------|-------------|-----|-------------------|------|
| White blood cell                |             | 537 | 1.04 (1.00, 1.08) | 0.07 |
| Ferritin                        |             | 537 | 1.00 (1.00, 1.00) | 0.25 |
| >2 quadrants in chest x-ray     | 2 or less   | 193 | Reference         |      |
|                                 | more than 2 | 344 | 1.51 (1.05, 2.16) | 0.03 |
| APACHE II                       |             | 537 | 0.97 (0.94, 1.01) | 0.13 |
| SOFA                            |             | 537 | 1.04 (0.96, 1.13) | 0.33 |
| Age                             |             | 537 | 1.01 (0.99, 1.02) | 0.42 |
| Invasive mechanical ventilation | no          | 534 | Reference         |      |
|                                 | yes         | 3   | 0.27 (0.01, 3.01) | 0.30 |
| Obesity                         | no          | 378 | Reference         |      |
|                                 | yes         | 159 | 0.73 (0.50, 1.07) | 0.10 |
| C-Reactive Protein              |             | 537 | 0.99 (0.98, 1.01) | 0.29 |

0.02 0.05 0.1 0.2 0.5 1 2

**e-Table 10:** Characteristics of 623 B phenotype patients according to ICU mortality

| Variable <sup>a</sup>                                  | Survivors n=464 | Non- survivors n=159 | p-value      |
|--------------------------------------------------------|-----------------|----------------------|--------------|
| <b>General characteristics and severity of illness</b> |                 |                      |              |
| Age, median (p25-75), year                             | 61(51-69)       | 71(63-75)            | <b>0.001</b> |
| Male, n(%)                                             | 301(64.9)       | 115(72.3)            | 0.10         |
| APACHE II <sup>b</sup> , median (p25-75),              | 12(9-16)        | 15(12-18)            | <b>0.001</b> |
| SOFA <sup>c</sup> , median(p25-75),                    | 4.5(3-6)        | 6.(4-7.5)            | <b>0.001</b> |
| <b>Laboratory findings</b>                             |                 |                      |              |
| D-lactate dehydrogenase, median (p25-75), U/L          | 463(366-555)    | 511(418-650)         | <b>0.001</b> |
| White blood cell, median (p25-75), x10 <sup>9</sup>    | 8.3(5.9-11.3)   | 9.6(6.4-13.7)        | <b>0.01</b>  |
| Serum creatinine, median (p25-75), mg/dL               | 0.78(0.64-0.94) | 0.88(0.7-1.18)       | <b>0.001</b> |
| C-Reactive Protein, median (p25-75), mg/dL             | 13.8(7.7-21.3)  | 17.3(10.0-25.5)      | <b>0.001</b> |
| Procalcitonin, median (p25-75), ng/mL                  | 0.21(0.10-0.45) | 0.27(0.14-0.79)      | <b>0.002</b> |
| Serum lactate, median (p25-75), mmol/L                 | 1.4(1.0-1.8)    | 1.7(1.1-2.2)         | <b>0.001</b> |
| D dimer, median (p25-75), ng/mL                        | 1140(575-2790)  | 1870(790-5780)       | <b>0.001</b> |
| Ferritin, median (p25-75), ng/mL                       | 1500(1200-1760) | 1775(1480-2350)      | <b>0.001</b> |
| <b>Coexisting condition and comorbidities</b>          |                 |                      |              |
| Arterial hypertension, n(%)                            | 123(26.5)       | 50(31.4)             | 0.27         |
| Obesity (BMI>30), n(%)                                 | 149(32.1)       | 51(32.1)             | 1.00         |
| Diabetes, n(%)                                         | 77(16.6)        | 31(19.5)             | 0.47         |
| Coronary arterial disease, n(%)                        | 29(6.2)         | 12(7.5)              | 0.70         |
| COPD, n(%)                                             | 20(4.3)         | 18(11.3)             | <b>0.003</b> |
| Chronic renal disease, n(%)                            | 8(1.7)          | 2(1.3)               | 0.97         |
| Hematologic disease, n(%)                              | 15(3.2)         | 7(4.4)               | 0.65         |
| Asthma, n(%)                                           | 34(7.3)         | 11(6.9)              | 1.00         |
| HIV, n(%)                                              | 1(0.2)          | 0(0.0)               | 1.00         |
| Pregnancy, n(%)                                        | 3(0.6)          | 0(0.0)               | 0.72         |
| Autoimmune disease, n(%)                               | 15(3.2)         | 3(1.9)               | 0.54         |
| Chronic heart disease, n(%)                            | 8(1.7)          | 2(1.3)               | 0.97         |
| Neuromuscular disease, n(%)                            | 3(0.6)          | 2(1.3)               | 0.81         |
| <b>Oxygenation and ventilator support</b>              |                 |                      |              |
| Oxygen mask, n(%)                                      | 86(18.5)        | 19(11.9)             | 0.07         |
| High flow nasal cannula, n(%)                          | 2(0.4)          | 1(0.6)               | 1.00         |
| Non-invasive ventilation, n(%)                         | 23(5.0)         | 3(1.9)               | 0.15         |
| Invasive mechanical ventilation, n(%)                  | 335(72.2)       | 140(88.1)            | <b>0.001</b> |
| PaO <sub>2</sub> /FiO <sub>2</sub> , median (p25-75),  | 169(147-220)    | 154(130-206)         | <b>0.001</b> |
| <b>Treatment</b>                                       |                 |                      |              |
| Corticosteroids, n(%)                                  | 251(54.1)       | 87(54.7)             | 0.96         |
| Antibiotics, n(%)                                      | 425(91.6)       | 148(93.1)            | 0.67         |
| Lopinavir/ritonavir, n(%)                              | 368(79.3)       | 140(88.1)            | <b>0.02</b>  |
| Hydroxychloroquine, No.(%)                             | 421(90.7)       | 145(91.2)            | 0.98         |
| Tocilizumab, No.(%)                                    | 160(34.5)       | 51(32.1)             | 0.64         |
| Interferon β, No.(%)                                   | 158(34.1)       | 66(41.5)             | 0.11         |
| <b>Complications and Outcome</b>                       |                 |                      |              |
| Shock, n(%)                                            | 142(30.6)       | 54(34.0)             | 0.49         |
| AKI, n(%)                                              | 58(12.5)        | 60(37.7)             | <b>0.001</b> |
| Myocardial dysfunction, n(%)                           | 24(5.2)         | 19(11.9)             | <b>0.006</b> |
| >2 quadrant infiltrates in chest x-ray, n(%)           | 292(62.9)       | 121(76.1)            | <b>0.001</b> |
| LOS UCI, median (p25-75), days                         | 13(6.7-23.0)    | 14(8.0-23.0)         | 0.29         |

Abbreviations: (p25-75): percentile range, range; APACHE II, Acute Physiology and Chronic Health Evaluation II; SOFA, Sequential Organ Failure Assessment; BMI, body mass index; COPD, Chronic obstructive pulmonary disease; HIV, human immunodeficiency viruses; PaO<sub>2</sub>/FiO<sub>2</sub>, Partial pressure arterial oxygen/ fraction of inspired oxygen

a Corresponds to minimum or maximum value, as appropriate, within 12 hours of ICU admission. The variables in this Table were no transformed for your comparison.

b APACHE II score to the severity of illness, the score is obtained by adding the following components 1) 12 clinical and laboratory variables each with a score range of 0 to 4 points (APS). The APS is determined from the worst physiologic values during the initial 24 h after ICU admission, 2) age with a range 0 to 6 points and 3) Chronic health points if the patients has history of severe organ system insufficiency or is immunocompromised assign 5 points if the patients is no operative or emergency postoperative and 2 points for elective postoperative patients with a total score range of 0 to 71.

c SOFA score corresponds to the severity of organ dysfunction, reflecting six organ systems each with a score range of 0 to 4 points (cardiovascular, hepatic, hematologic, respiratory, neurological, renal), with a total score range of 0 to 24,

**e-Figure 5:** Unadjusted survival plot (Kaplan-Meier) for B phenotype patients according to corticosteroids treatment

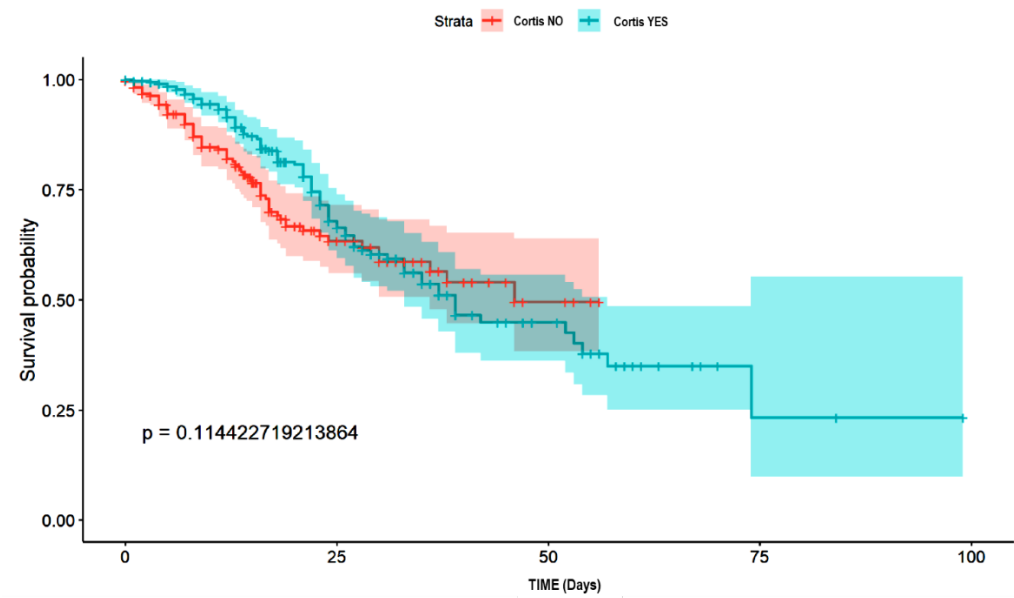

**e-Table 11:** Factors associated with ICU mortality in Cox Hazard regression analysis for patients among B phenotype

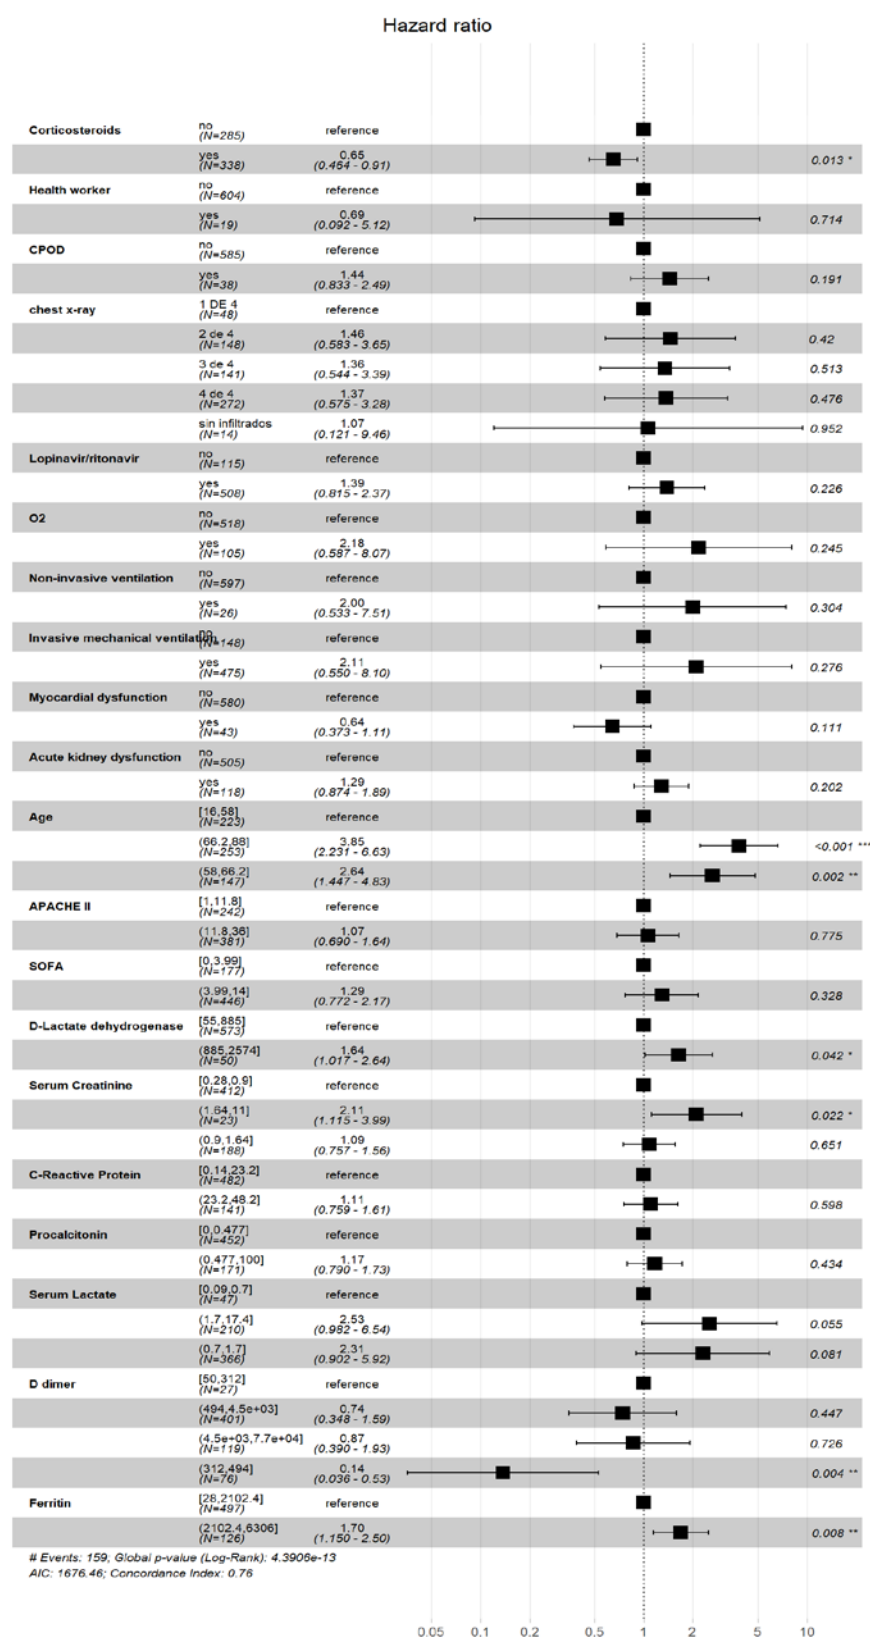

e-Figure 6: Competing Risk analysis plot (Fine and Gray) for B phenotype patient’s

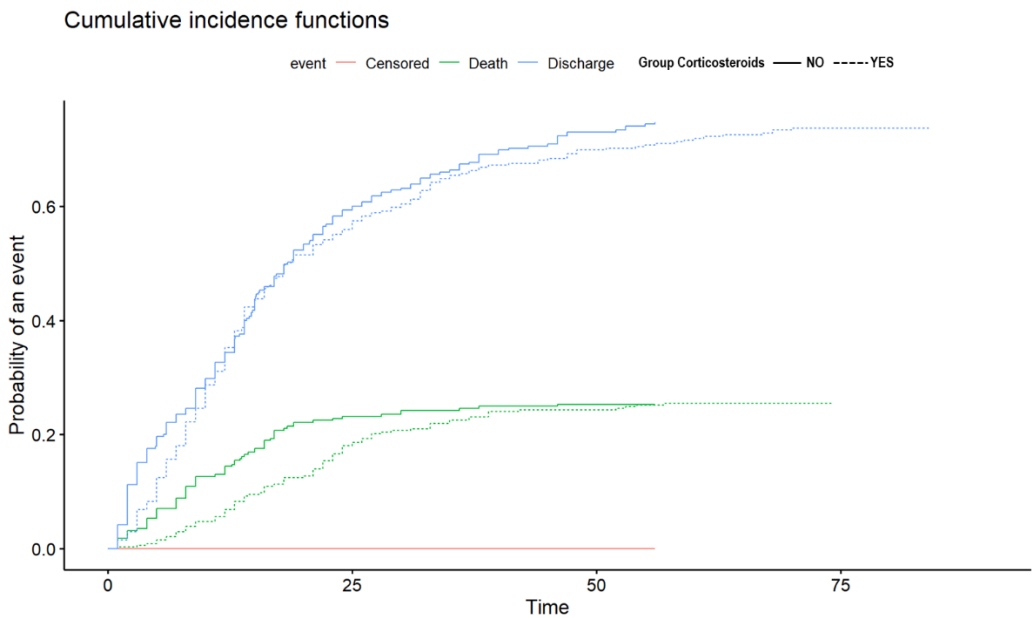

**e-Table12:** Factors associated with corticosteroids use in B phenotype patient'

| Variable                        | N       | Odds ratio                                                                         | p                       |
|---------------------------------|---------|------------------------------------------------------------------------------------|-------------------------|
| D-Lactate dehydrogenase         | 623     |   | 1.00 (1.00, 1.00) 0.023 |
| Serum Lactate                   | 623     |  | 1.13 (1.02, 1.26) 0.023 |
| White blood cell                | 623     |   | 1.04 (1.01, 1.08) 0.016 |
| O2                              | no 518  |   | Reference               |
|                                 | yes 105 |   | 0.38 (0.18, 0.78) 0.008 |
| Myocardial dysfunction          | no 580  |   | Reference               |
|                                 | yes 43  |   | 0.37 (0.18, 0.75) 0.006 |
| APACHE II                       | 623     |   | 0.99 (0.95, 1.02) 0.526 |
| SOFA                            | 623     |   | 0.95 (0.88, 1.02) 0.165 |
| Age                             | 623     |   | 1.01 (0.99, 1.02) 0.478 |
| Invasive mechanical ventilation | no 148  |   | Reference               |
|                                 | yes 475 |  | 0.88 (0.46, 1.68) 0.710 |
| Obesity                         | no 423  |   | Reference               |
|                                 | yes 200 |  | 1.09 (0.76, 1.56) 0.637 |
| C-Reactive Protein              | 623     |   | 1.00 (0.99, 1.02) 0.792 |



**e-Table 13:** Characteristics of 857 C phenotype patients according to ICU mortality

| Variable <sup>a</sup>                                  | Survivors n=468 | Non-survivors n=389 | p-value      |
|--------------------------------------------------------|-----------------|---------------------|--------------|
| <b>General characteristics and severity of illness</b> |                 |                     |              |
| Age, median (p25-75), year                             | 63(55-69)       | 68(63-74)           | <b>0.001</b> |
| Male, n(%)                                             | 336(71.8)       | 290(74.6)           | 0.40         |
| APACHE II <sup>b</sup> , median (p25-75)               | 15(12-20)       | 18(15-23)           | <b>0.001</b> |
| SOFA <sup>c</sup> , median(p25-75)                     | 7.0(5-8)        | 7.4(6-9)            | <b>0.001</b> |
| <b>Laboratory findings</b>                             |                 |                     |              |
| D-lactate dehydrogenase, median (p25-75), U/L          | 655(548-909)    | 680(565-933)        | 0.07         |
| White blood cell, median (p25-75), x10 <sup>9</sup>    | 9.6(6.6-13.2)   | 10.3(7.3-14.3)      | <b>0.01</b>  |
| Serum creatinine, median (p25-75), mg/dL               | 0.9(0.7-1.26)   | 1.0(0.7-1.4)        | <b>0.001</b> |
| C-Reactive Protein, median (p25-75), mg/dL             | 17(10-26)       | 18(10-27)           | 0.54         |
| Procalcitonin, median (p25-75), ng/mL                  | 0.5(0.2-1.1)    | 0.6(0.2-1.6)        | 0.05         |
| Serum lactate, median (p25-75), mmol/L                 | 1.5(1.1-1.9)    | 1.8(1.4-2.5)        | <b>0.001</b> |
| D dimer, median (p25-75), ng/mL                        | 2046(880-4260)  | 3060(1250-5820)     | <b>0.001</b> |
| Ferritin, median (p25-75), ng/mL                       | 1700(1330-2260) | 2000(1530-2690)     | <b>0.001</b> |
| <b>Coexisting condition and comorbidities</b>          |                 |                     |              |
| Arterial hypertension, n(%)                            | 288(61.5)       | 260(66.8)           | 0.12         |
| Obesity (BMI>30), n(%)                                 | 162(34.6)       | 132(33.9)           | 0.89         |
| Diabetes, n(%)                                         | 94(20.1)        | 104(26.7)           | <b>0.02</b>  |
| Coronary arterial disease, n(%)                        | 10(2.1)         | 38(9.8)             | <b>0.001</b> |
| COPD, n(%)                                             | 35(7.5)         | 38(9.8)             | 0.28         |
| Chronic renal disease, n(%)                            | 19(4.1)         | 25(6.4)             | 0.15         |
| Hematologic disease, n(%)                              | 8(1.7)          | 22(5.7)             | <b>0.03</b>  |
| Asthma, n(%)                                           | 19(4.1)         | 15(3.9)             | 1.00         |
| HIV, n(%)                                              | 1(0.2)          | 1(0.3)              | 1.00         |
| Pregnancy, n(%)                                        | 0(0.0)          | 0(0.0)              | NA           |
| Autoimmune disease, n(%)                               | 17(3.6)         | 19(4.9)             | 0.46         |
| Chronic heart disease, n(%)                            | 14(3.0)         | 12(3.1)             | 1.00         |
| Neuromuscular disease, n(%)                            | 3(0.6)          | 5(1.3)              | 0.53         |
| <b>Oxygenation and ventilator support</b>              |                 |                     |              |
| Oxygen mask, n(%)                                      | 48(10.3)        | 48(12.3)            | 0.39         |
| High flow nasal cannula, n(%)                          | 16(3.4)         | 11(2.8)             | 0.76         |
| Non-invasive ventilation, n(%)                         | 27(5.8)         | 23(5.9)             | 1.00         |
| Invasive mechanical ventilation, n(%)                  | 379(81.0)       | 315(81.0)           | 1.00         |
| PaO <sub>2</sub> /FiO <sub>2</sub> , median (p25-75),  | 132(96-164)     | 116(82-144)         | <b>0.001</b> |
| <b>Treatment</b>                                       |                 |                     |              |
| Corticosteroids, n(%)                                  | 288(61.5)       | 247(63.5)           | 0.64         |
| Antibiotics, n(%)                                      | 427(91.2)       | 353(90.7)           | 0.89         |
| Lopinavir/ritonavir, n(%)                              | 382(81.6)       | 316(81.2)           | 0.95         |
| Hydroxychloroquine, No.(%)                             | 449(95.9)       | 356(91.5)           | <b>0.01</b>  |
| Tocilizumab, No.(%)                                    | 139(29.7)       | 95(24.4)            | 0.09         |
| Interferon $\beta$ , No.(%)                            | 155(33.1)       | 146(37.5)           | 0.20         |
| <b>Complications and Outcome</b>                       |                 |                     |              |
| Shock, n(%)                                            | 358(76.5)       | 294(75.6)           | 0.81         |
| AKI, n(%)                                              | 141(30.1)       | 209(53.7)           | <b>0.001</b> |
| Myocardial dysfunction, n(%)                           | 36(7.7)         | 60(15.4)            | <b>0.001</b> |
| >2 quadrant infiltrates in chest x-ray, n(%)           | 301(64.3)       | 272(69.9)           | 0.08         |
| LOS UCI, median (p25-75), days                         | 20(13-32)       | 15(8-24)            | <b>0.001</b> |

Abbreviations: (p25-75):percentile range; APACHE II, Acute Physiology and Chronic Health Evaluation II; SOFA, Sequential Organ Failure Assessment; BMI, body mass index; COPD, Chronic obstructive pulmonary disease; HIV, human immunodeficiency viruses; PaO<sub>2</sub>/FiO<sub>2</sub>, Partial pressure arterial oxygen/ fraction of inspired oxygen

a Corresponds to minimum or maximum value, as appropriate, within 12 hours of ICU admission. The variables in this Table were no transformed for your comparison.

b APACHE II score to the severity of illness, the score is obtained by adding the following components 1) 12 clinical and laboratory variables each with a score range of 0 to 4 points (APS). The APS is determined from the worst physiologic values during the initial 24 h after ICU admission, 2) age with a range 0 to 6 points and 3) Chronic health points if the patients has history of severe organ system insufficiency or is immunocompromised assign 5 points if the patients is no operative or emergency postoperative and 2 points for elective postoperative patients with a total score range of 0 to 71.

c SOFA score corresponds to the severity of organ dysfunction, reflecting six organ systems each with a score range of 0 to 4 points (cardiovascular, hepatic, hematologic, respiratory, neurological, renal), with a total score range of 0 to 24,

**e-Figure 7:** Unadjusted survival plot (Kaplan-Meier) for C phenotype patients according to corticosteroids treatment

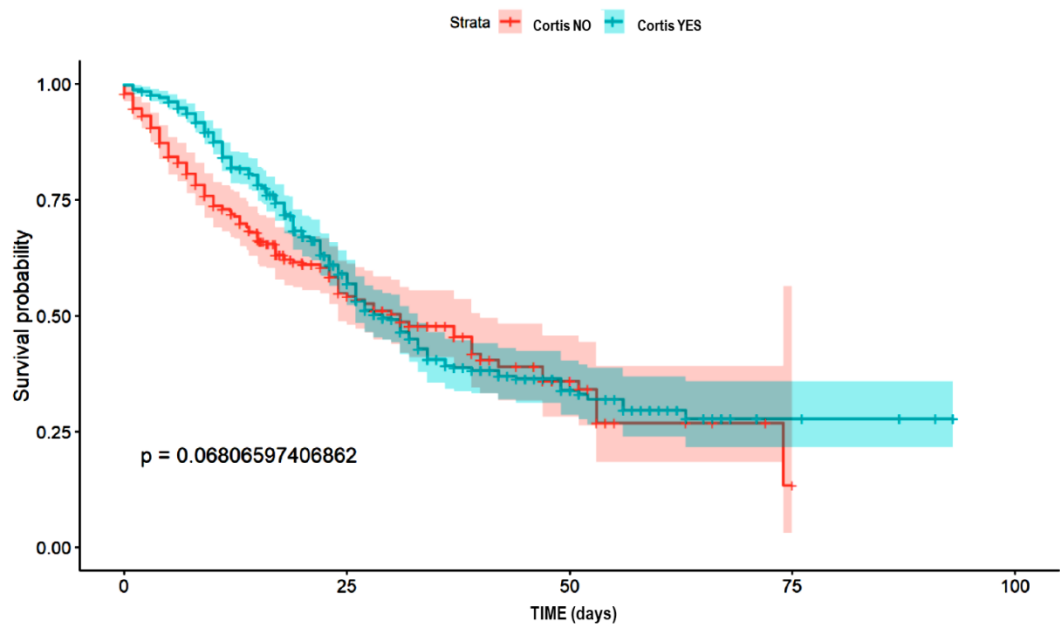

e-Figure 8: Competing risk analysis plot (Fine and Gray) for C phenotype patient's

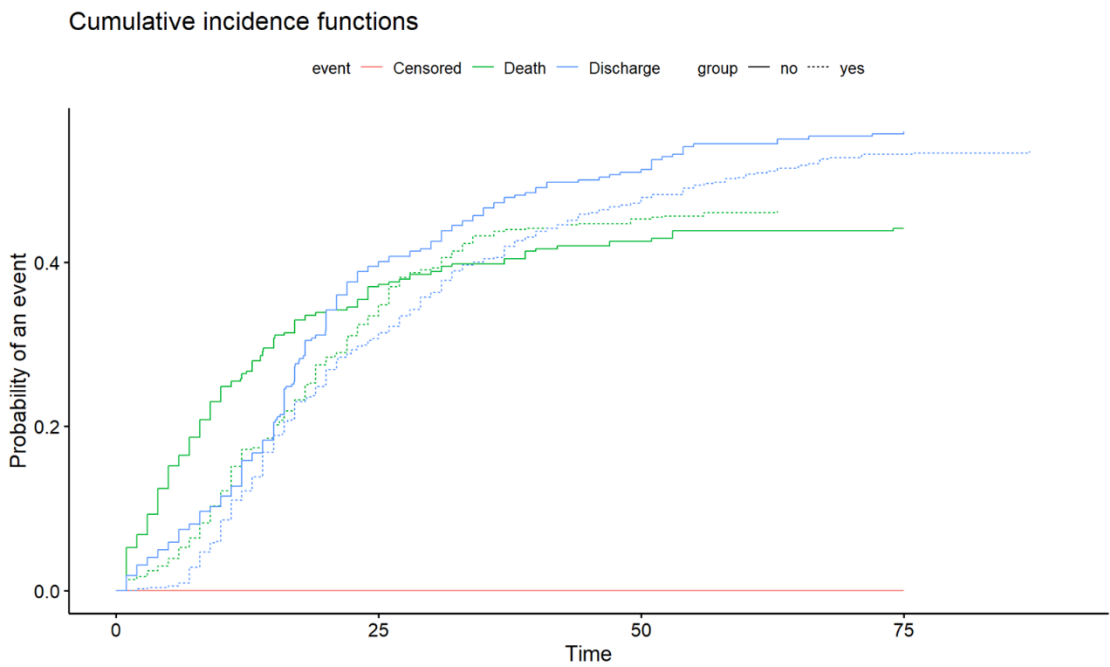

**e-Table 14:** Factors associated with ICU mortality in Cox Hazard regression analysis for patients among C phenotype

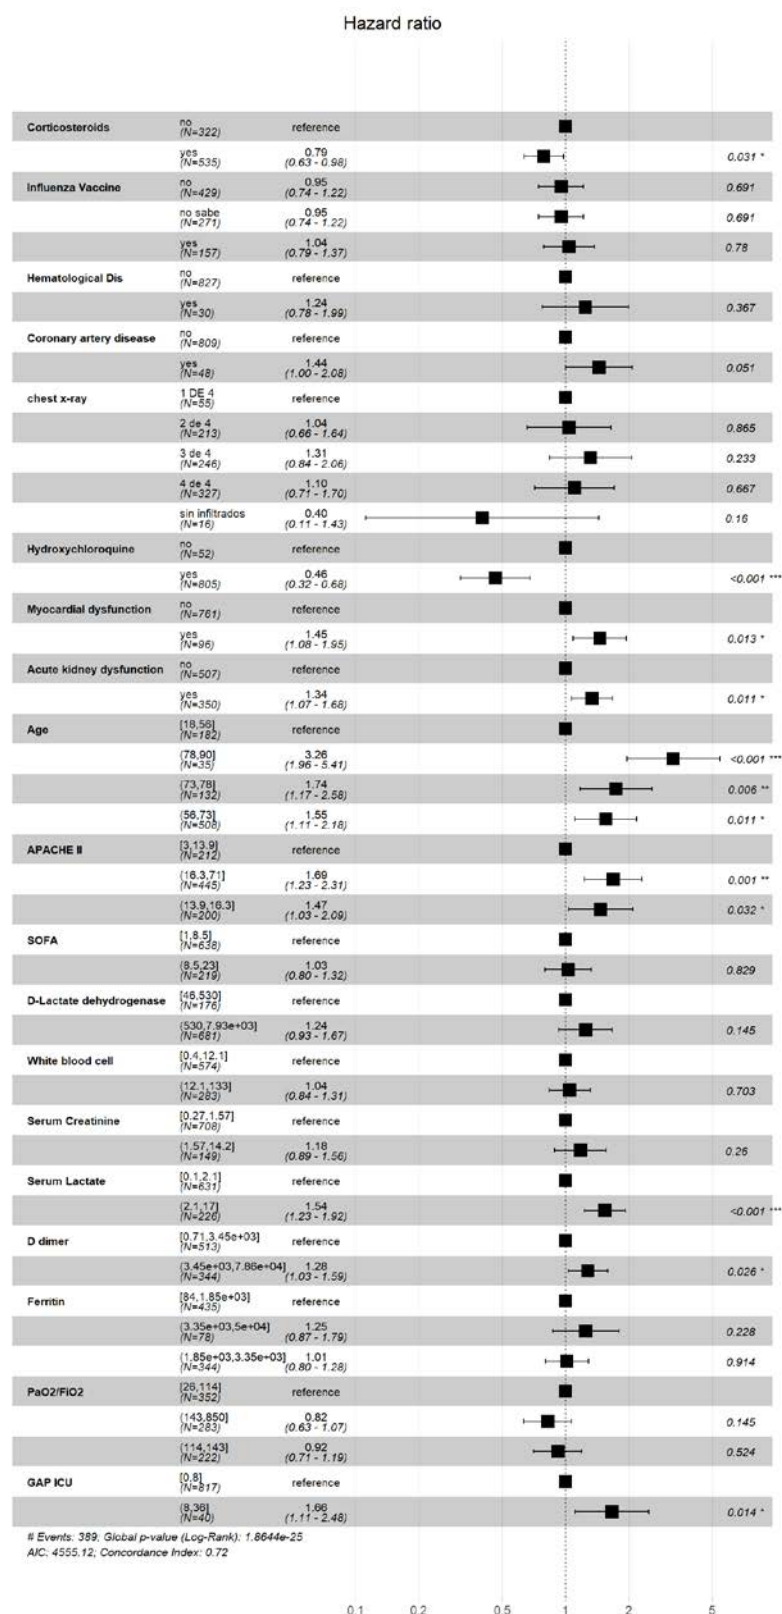

**e-Table 15:** Variables associated with corticosteroid use in C phenotype patients

| Variable                               | N       | Odds ratio                                                                          | p                        |
|----------------------------------------|---------|-------------------------------------------------------------------------------------|--------------------------|
| <b>D-Lactate dehydrogenase</b>         | 857     |    | 1.00 (1.00, 1.00) <0.001 |
| <b>Arterial Hypertension</b>           | no 309  |    | Reference                |
|                                        | yes 548 |    | 0.62 (0.45, 0.85) 0.003  |
| <b>APACHE II</b>                       | 857     |    | 0.98 (0.96, 1.01) 0.179  |
| <b>SOFA</b>                            | 857     |    | 1.00 (0.94, 1.06) 0.997  |
| <b>Age</b>                             | 857     |    | 1.00 (0.98, 1.01) 0.573  |
| <b>Invasive mechanical ventilation</b> | no 163  |    | Reference                |
|                                        | yes 694 |   | 1.24 (0.87, 1.77) 0.234  |
| <b>Obesity</b>                         | no 563  |    | Reference                |
|                                        | yes 294 |  | 1.04 (0.77, 1.41) 0.786  |
| <b>C-Reactive Protein</b>              | 857     |  | 0.99 (0.98, 1.01) 0.292  |

0.6 0.8 1 1.2 1.4 1.6
